# Supplementary material for: CaMKII Serine 280 O-GlcNAcylation Links Diabetic Hyperglycemia to Proarrhythmia
Source: PubMed Central journal article supplement — Circ Res. 2021 Apr 30;129(1):98–113. doi: 10.1161/CIRCRESAHA.120.318402 (PMC8221539; doi:10.1161/circresaha.120.318402), 2021-04-30

Full unedited gels for Figure 1

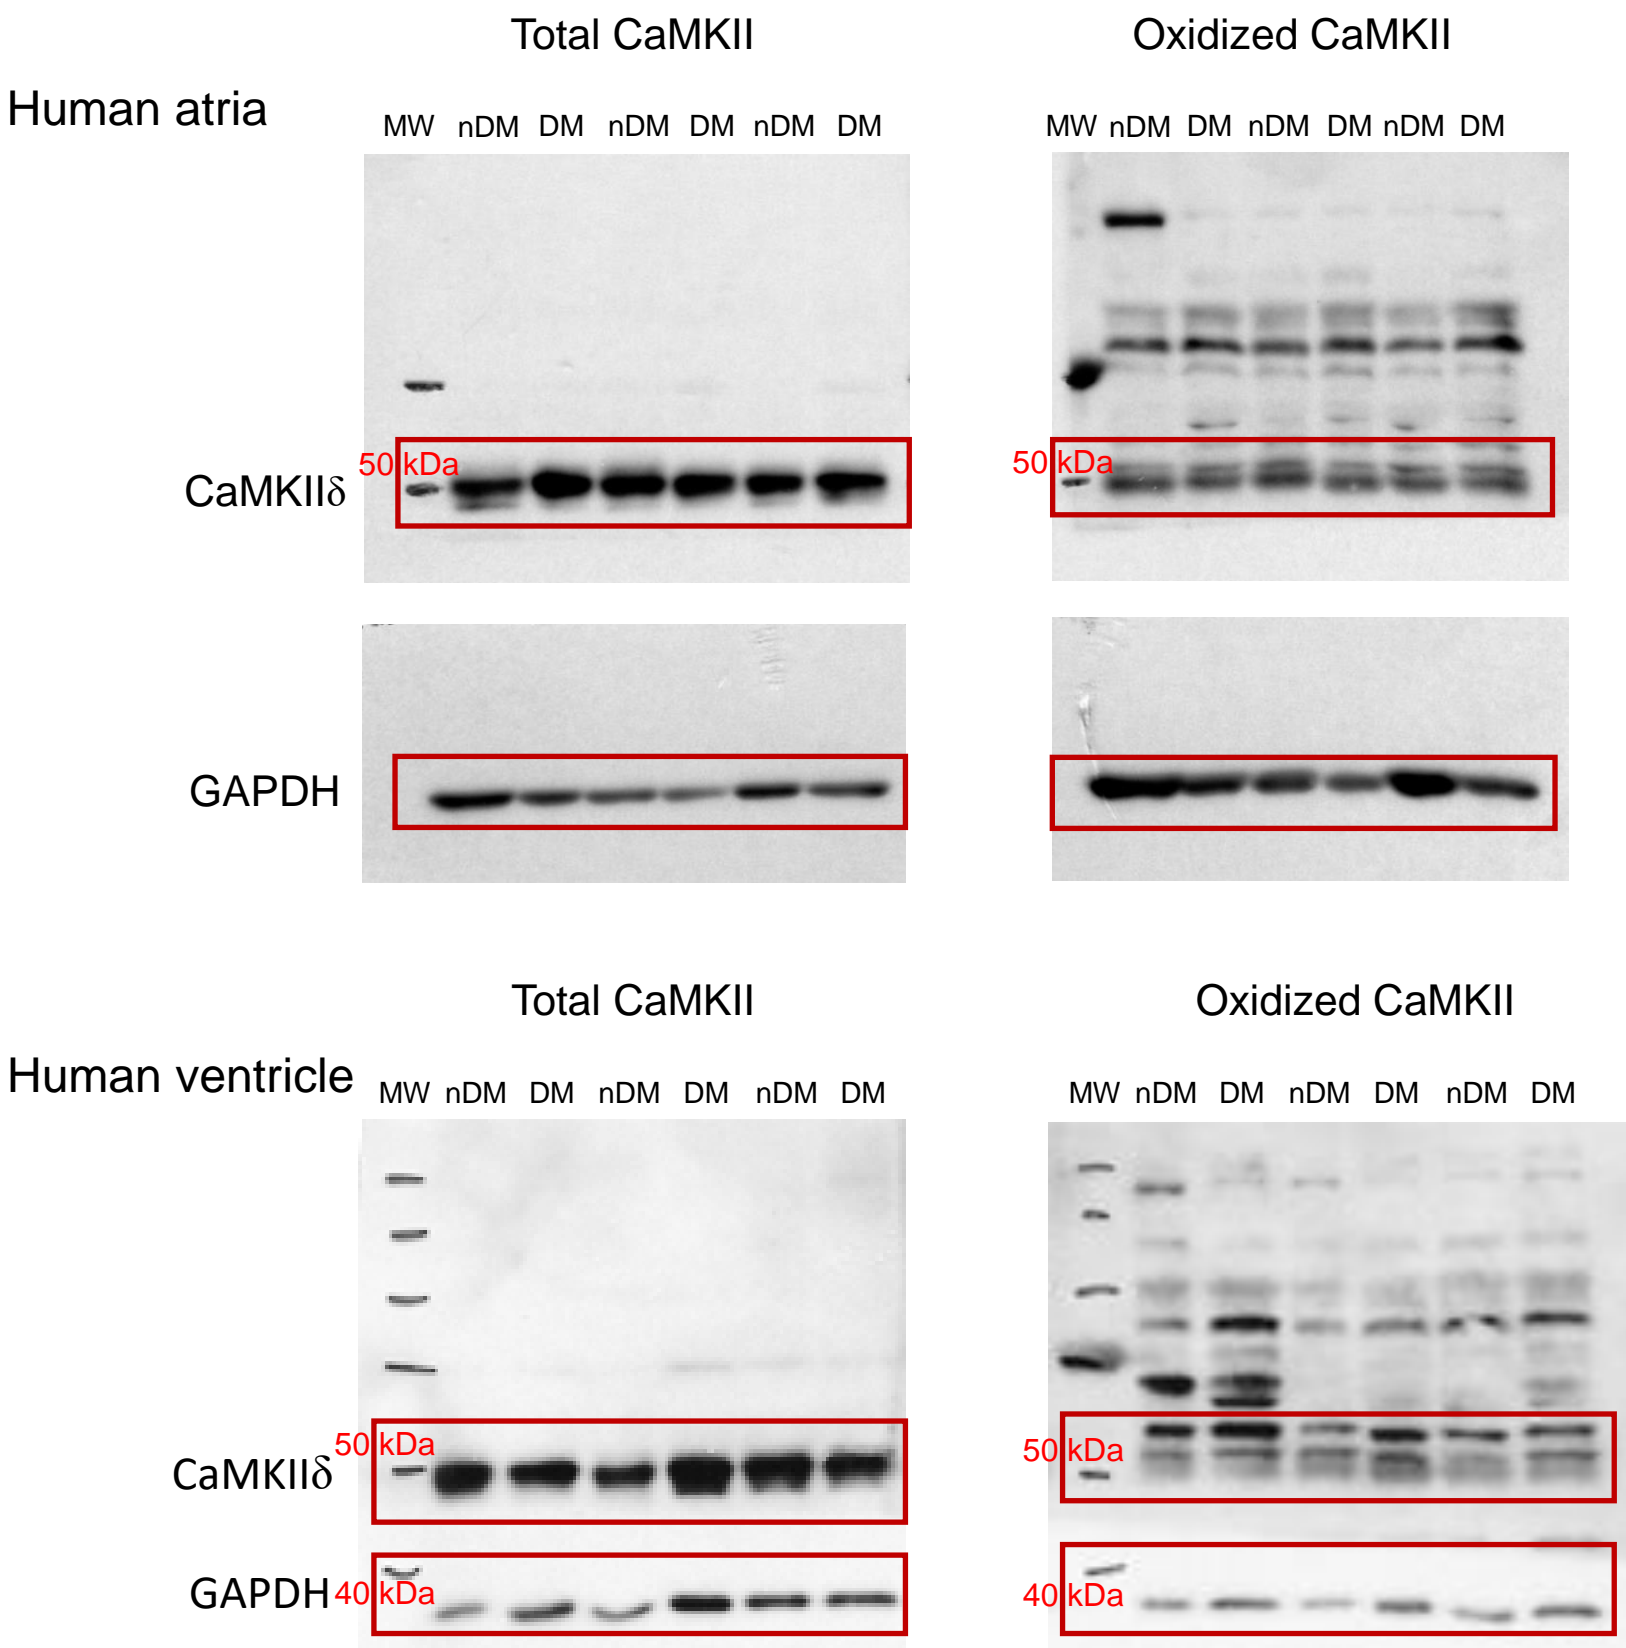

# Full unedited gels for Figure IV (Part I)

**pS2814**

**CaMKII $\delta$  WT**

**CaMKII $\delta$  KO**

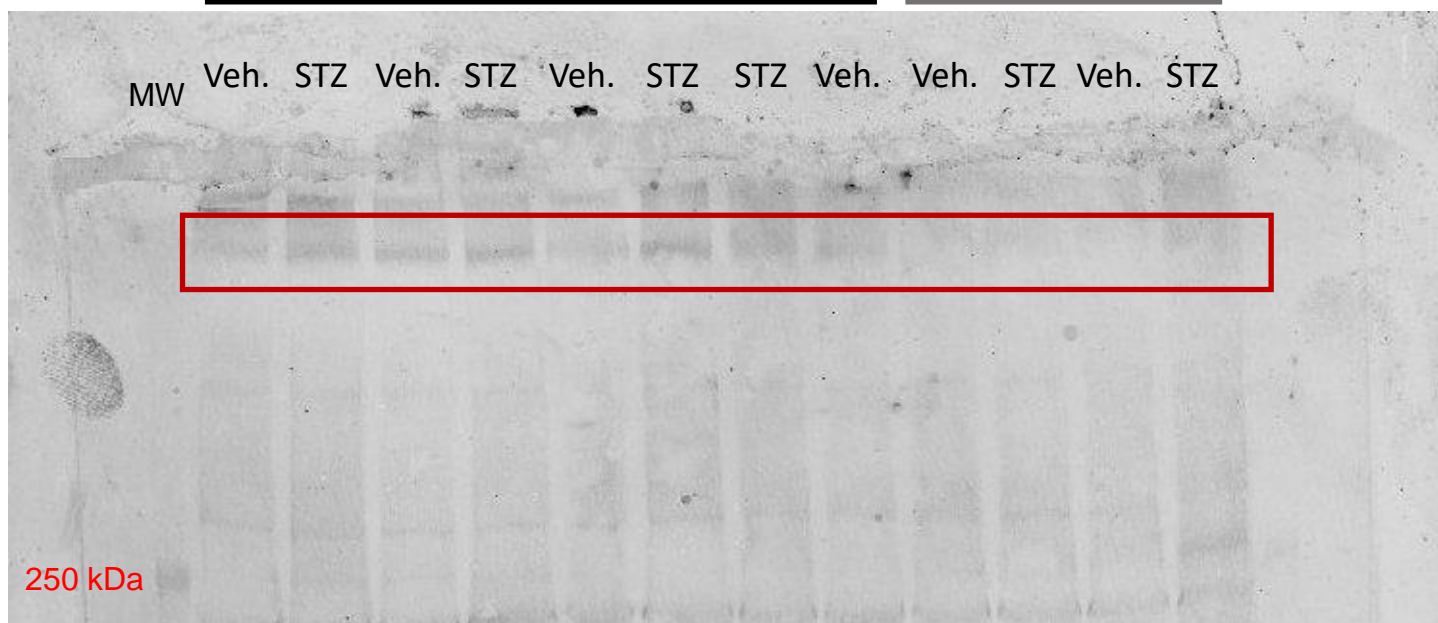

**Total RyR**

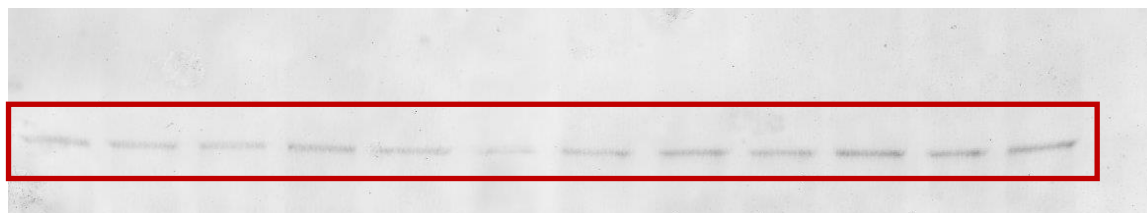

The gel has been cut before reprobing the blot for total RyR2 around the expected molecular weight of RyR2 (MW>500 kDa, confirmed previously by the pS2814 staining) to reduce the antibody use.

# Full unedited gels for Figure IV (Part II)

## PLB IP O-GlcNAc

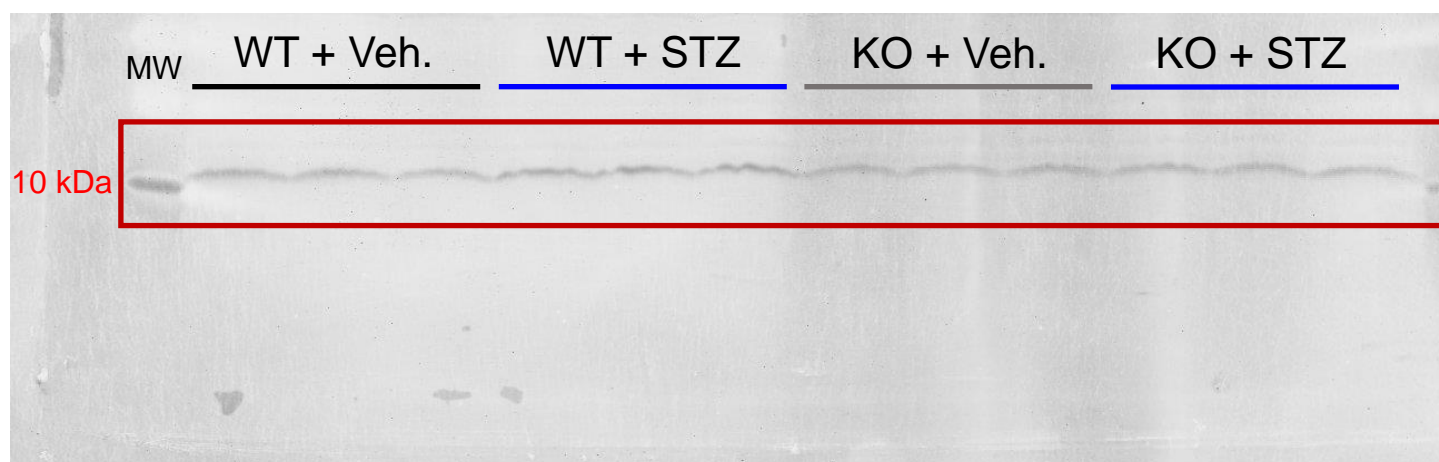

## Total PLB

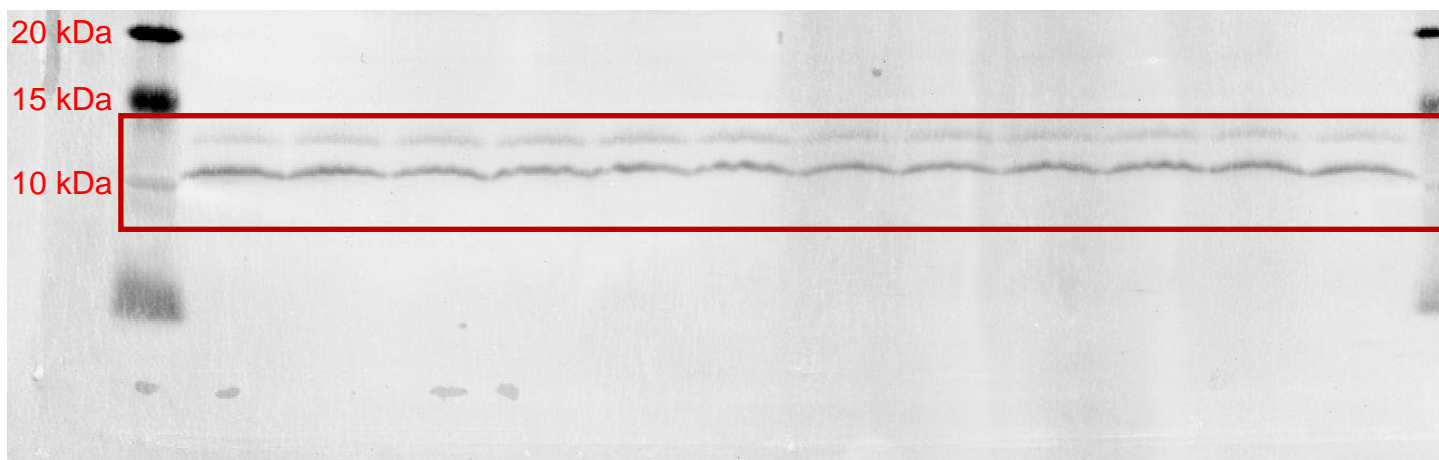

## Merged image

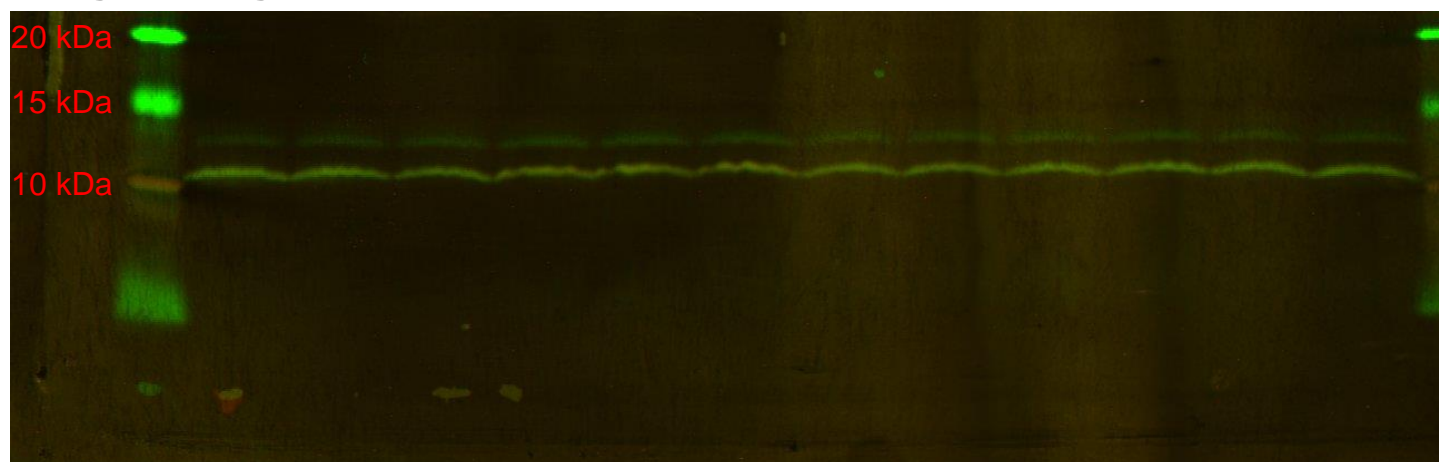

Full unedited gels for Supplemental Figure I (Part I)

Color

B&W

CaMKII pT287

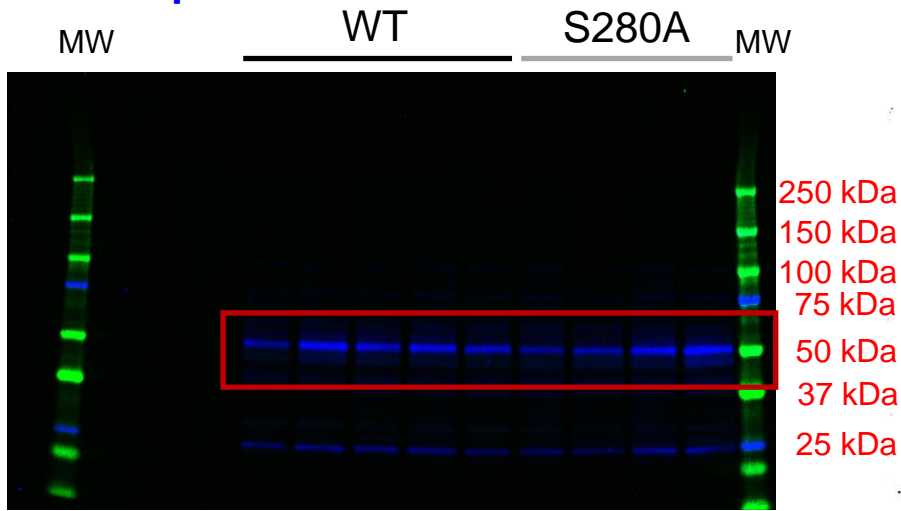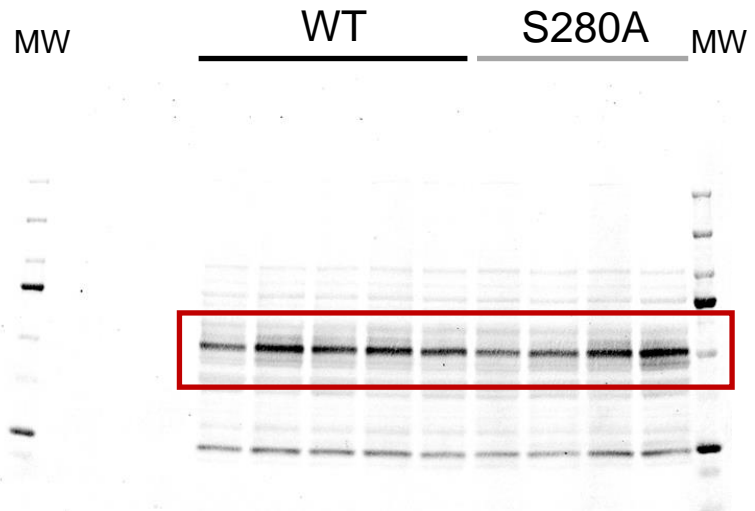

CaMKII $\delta$

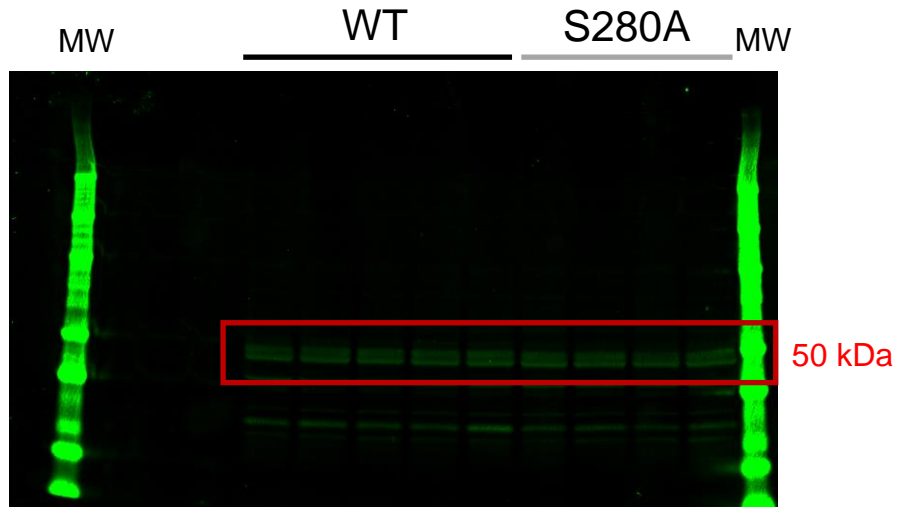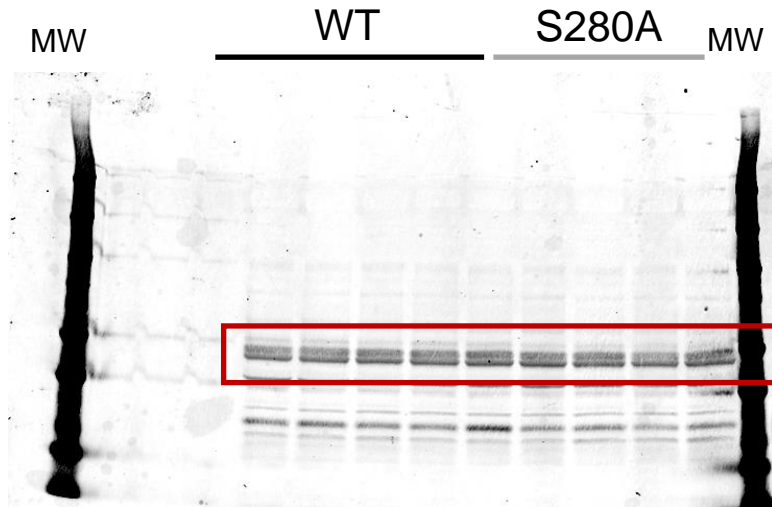

GAPDH

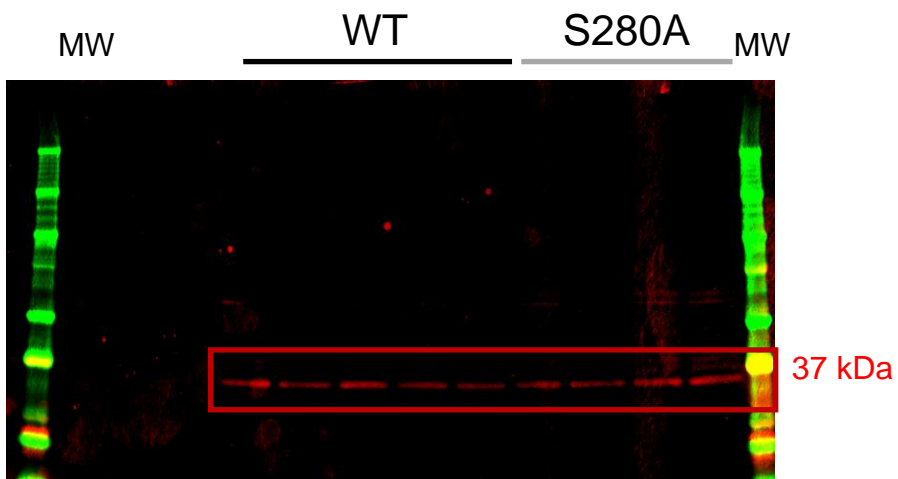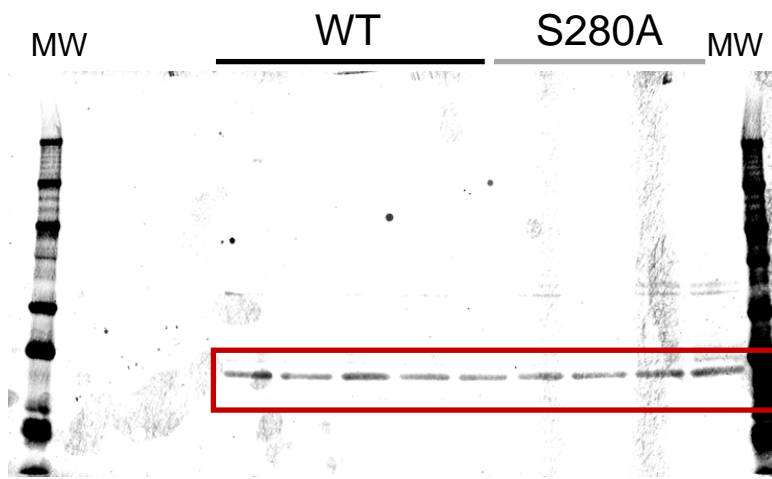

# Full unedited gels for Supplemental Figure I (Part II)

## Color

## B&W

### PLB pT17

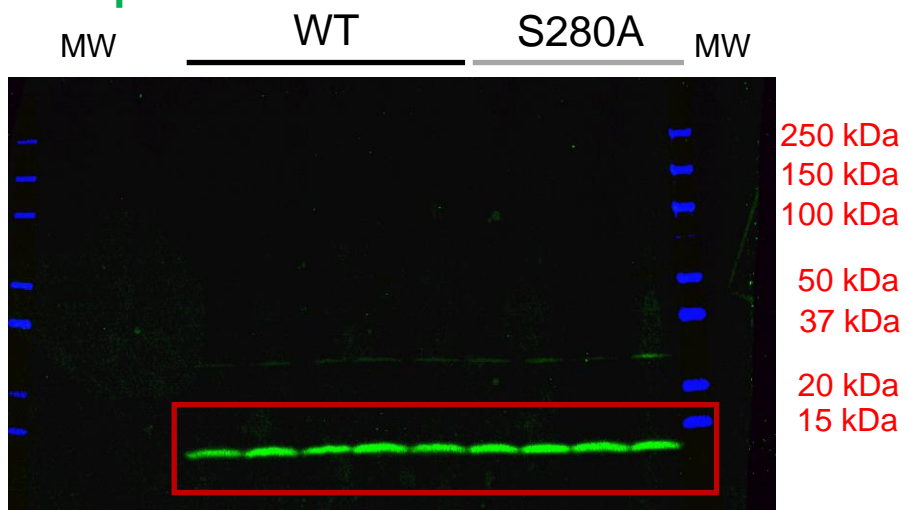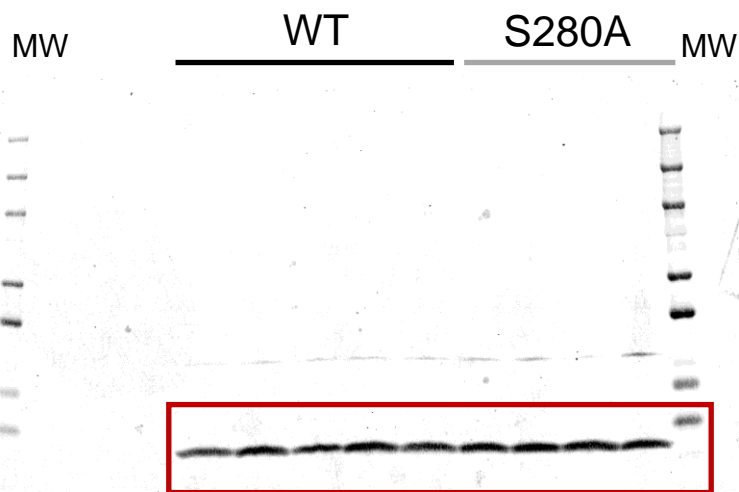

### PLB

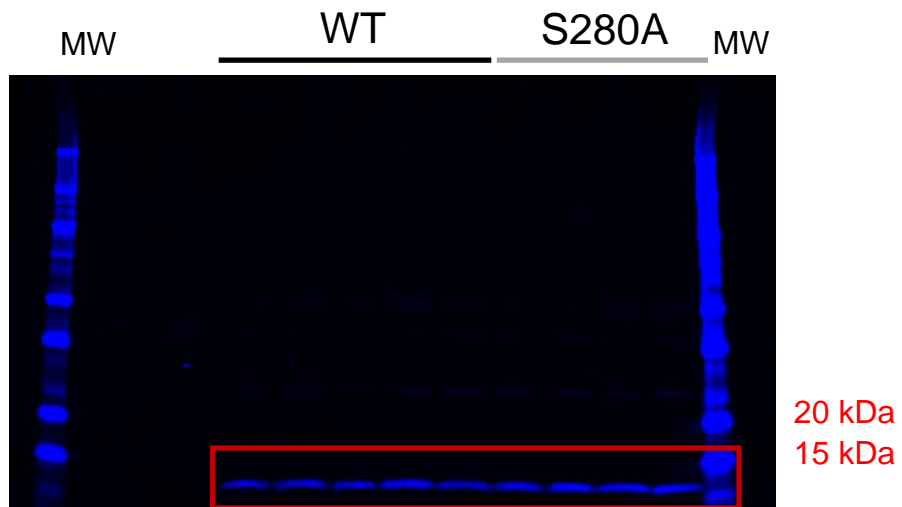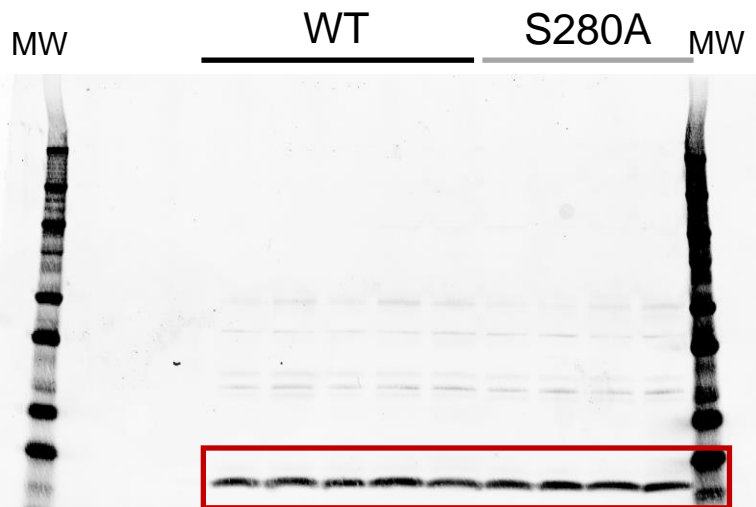

### GAPDH

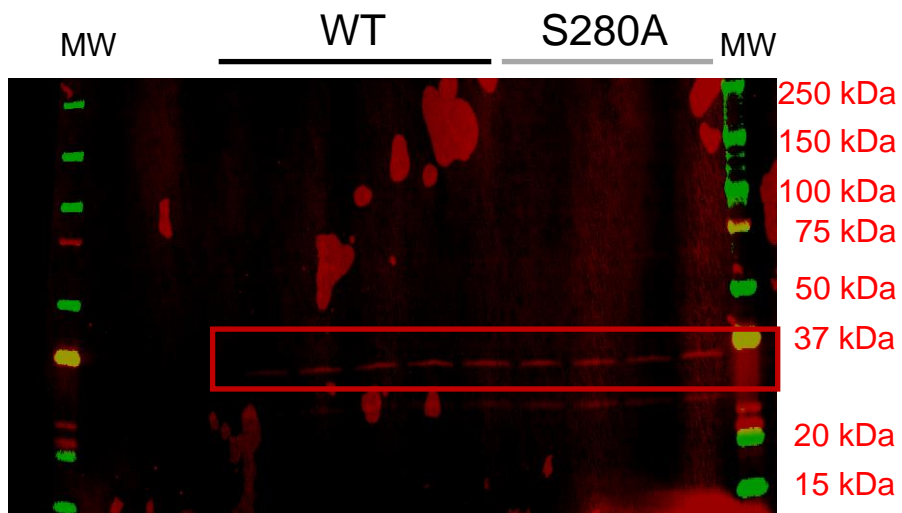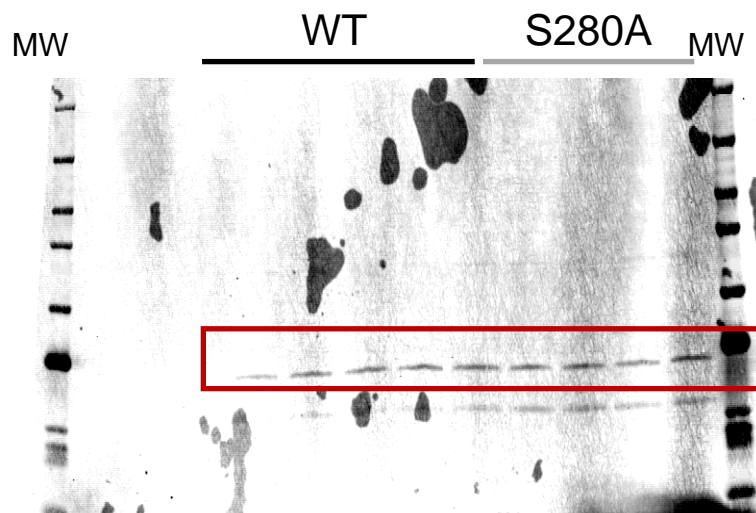

# Full unedited gels for Supplemental Figure VI (Part I)

**Color**

**B&W**

**pT17-PLB**

MW Vehicle STZ MW

MW Vehicle STZ MW

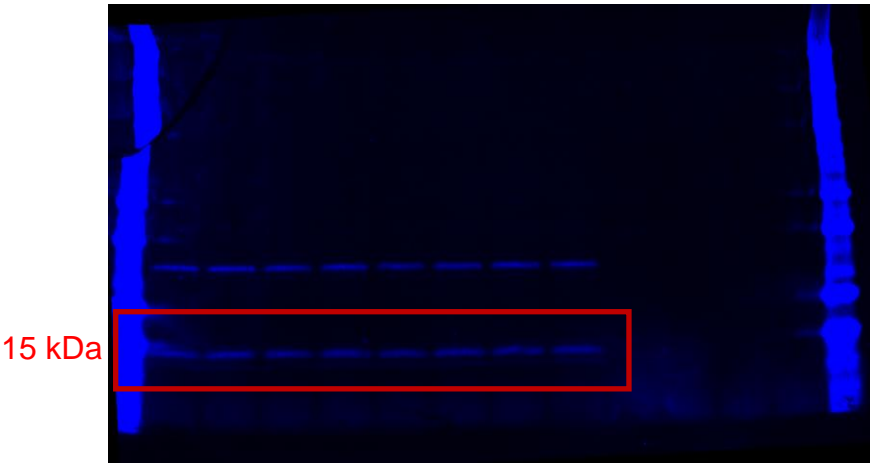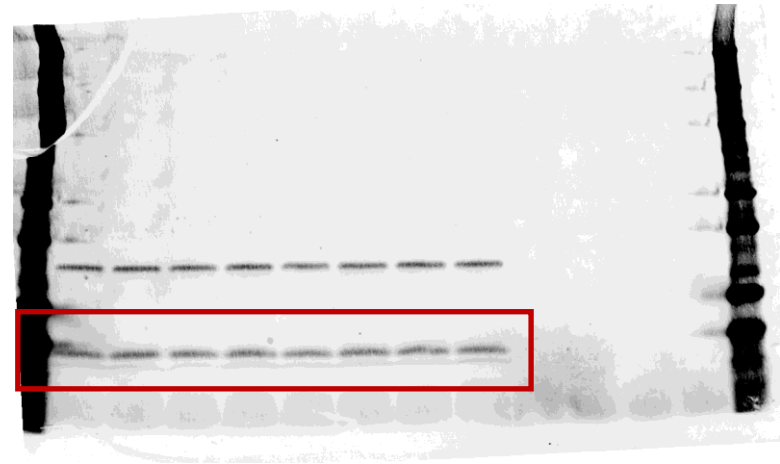

**tot PLB**

MW Vehicle STZ MW

MW Vehicle STZ MW

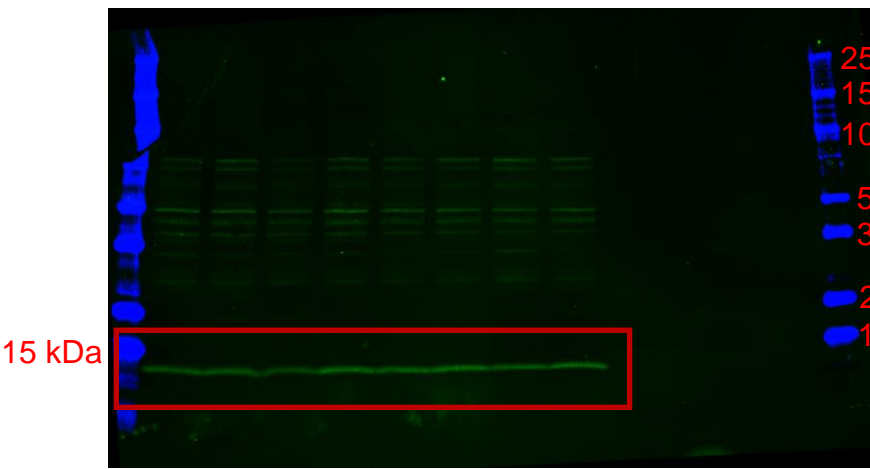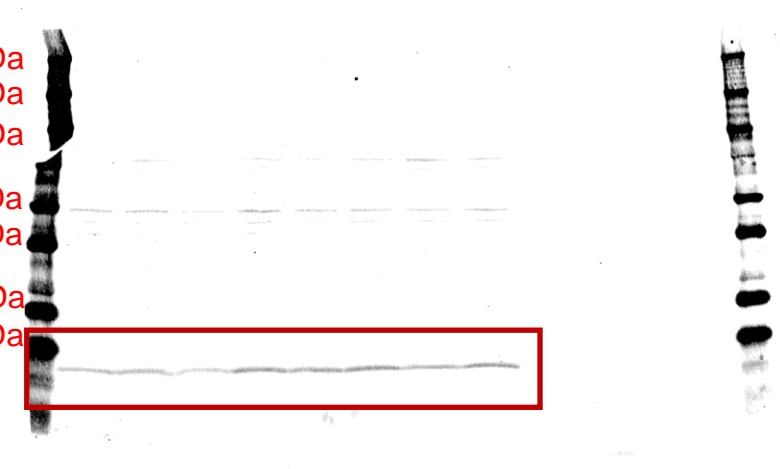

**GAPDH**

MW Vehicle STZ MW

MW Vehicle STZ MW

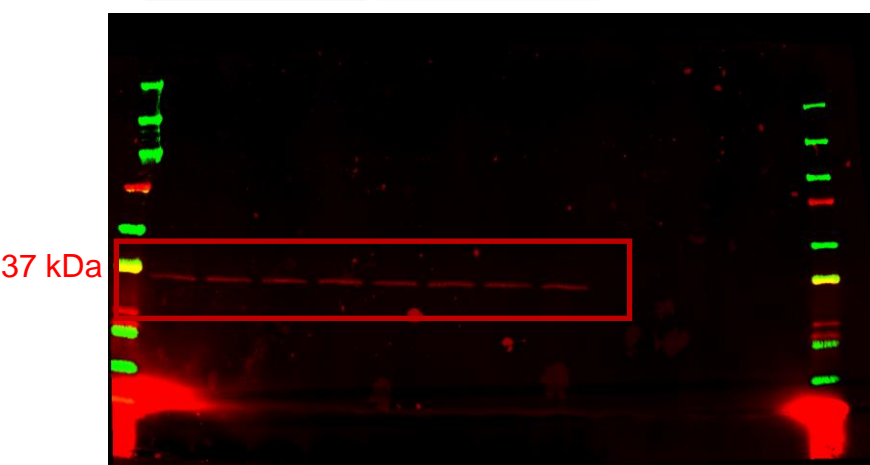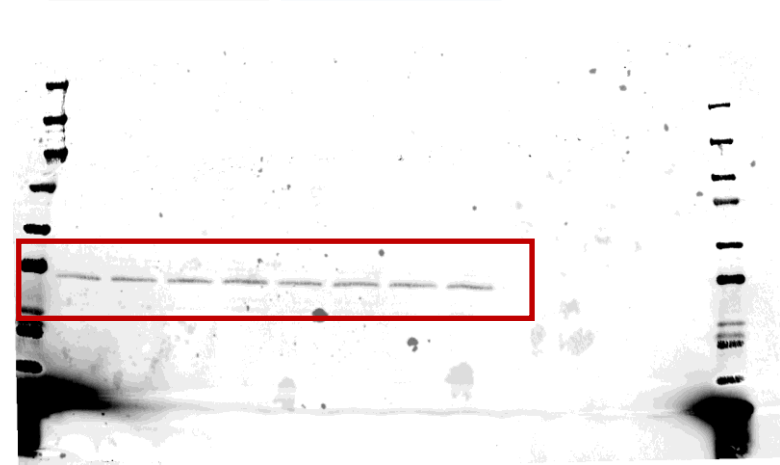

# Full unedited gels for Supplemental Figure VI (Part II)

**Color**

**B&W**

**pS16-PLB**

MW Vehicle STZ MW

MW Vehicle STZ MW

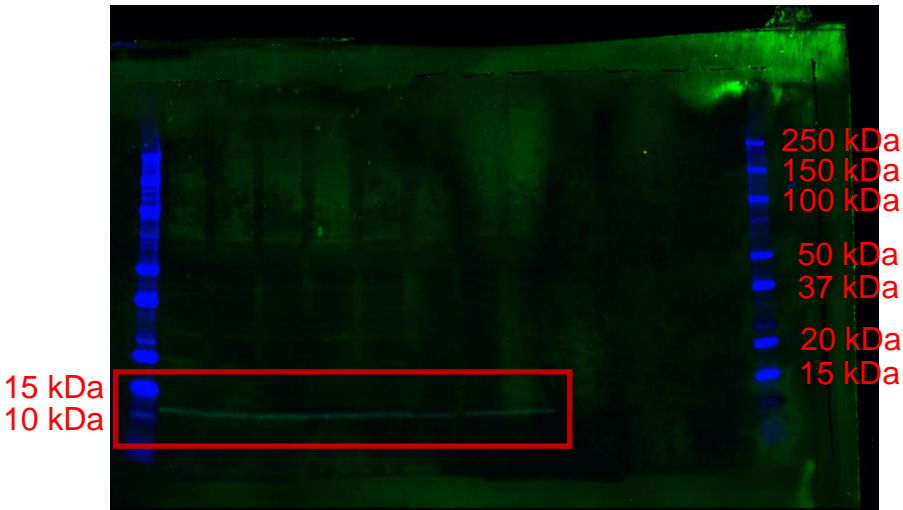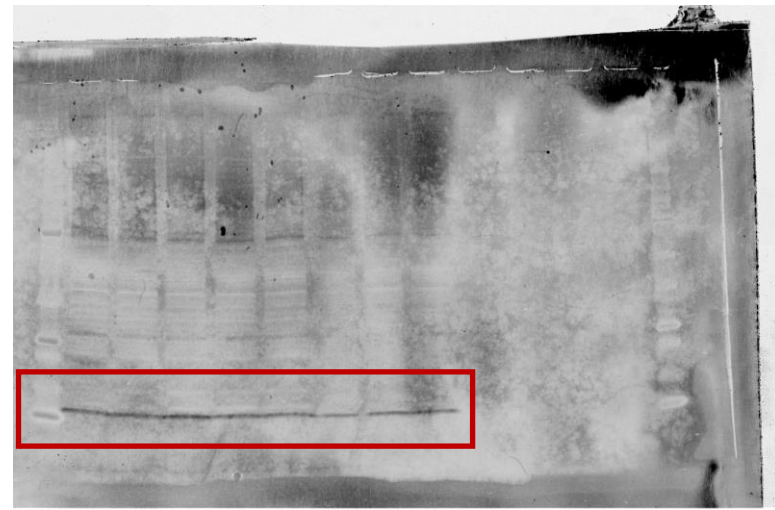

**tot PLB**

MW Vehicle STZ MW

MW Vehicle STZ MW

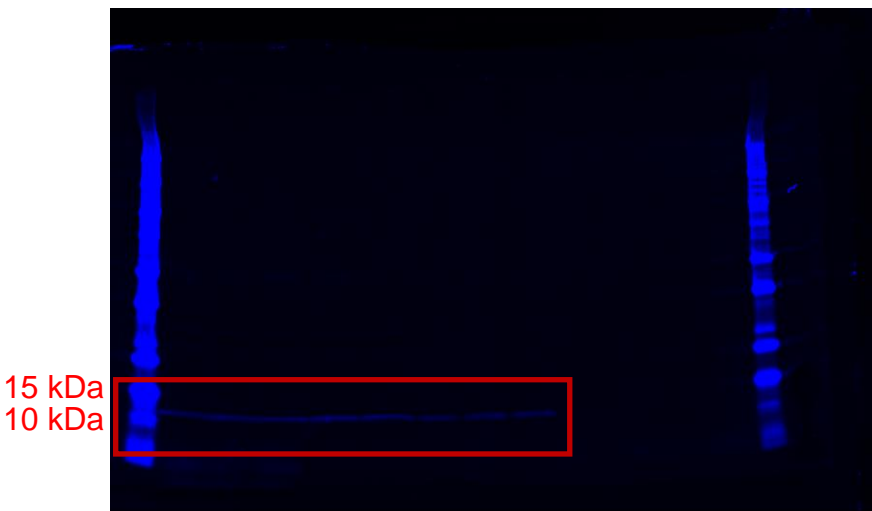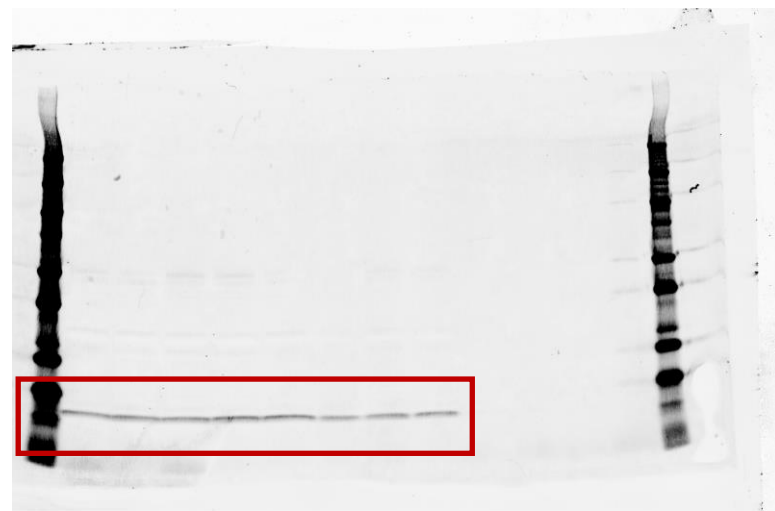

Supplement: res-129-98-s002.pdf [file res-129-98-s002.pdf]
