# Supplementary material for: CaMKII Serine 280 O-GlcNAcylation Links Diabetic Hyperglycemia to Proarrhythmia
Source: PubMed Central journal article supplement — Circ Res. 2021 Apr 30;129(1):98–113. doi: 10.1161/CIRCRESAHA.120.318402 (PMC8221539; doi:10.1161/circresaha.120.318402), 2021-04-30
Supplement: res-129-98-s005.pdf [file res-129-98-s005.pdf]

## Major Resources Table

In order to allow validation and replication of experiments, all essential research materials listed in the Methods should be included in the Major Resources Table below. Authors are encouraged to use public repositories for protocols, data, code, and other materials and provide persistent identifiers and/or links to repositories when available. Authors may add or delete rows as needed.

### Animals (in vivo studies)

| Species             | Vendor or Source   | Background Strain | Sex | Persistent ID / URL                                                               |
|---------------------|--------------------|-------------------|-----|-----------------------------------------------------------------------------------|
| WT mouse            | Jackson Laboratory | C57BL/6J          | M/F | <a href="https://www.jax.org/strain/000664">https://www.jax.org/strain/000664</a> |
| NOX2 <sup>-/-</sup> | Jackson Laboratory | C57BL/6J          | M   | <a href="https://www.jax.org/strain/002365">https://www.jax.org/strain/002365</a> |

### Genetically Modified Animals

|                 | Species                             | Vendor or Source      | Background Strain | Other Information                                               | Persistent ID / URL        |
|-----------------|-------------------------------------|-----------------------|-------------------|-----------------------------------------------------------------|----------------------------|
| Parent - Male   | CaMKII $\delta$ S280A KI            | J Chen Lab, UCSD      | C57BL/6J          |                                                                 | Publication cited in paper |
| Parent - Female | CaMKII $\delta$ S280A KI            | J Chen Lab, UCSD      | C57BL/6J          |                                                                 | Publication cited in paper |
| Parent - Male   | CaMKII $\delta$ MM281/2VV KI        | ME Anderson Lab, JHMI | C57BL/6J          |                                                                 | Publication cited in paper |
| Parent - Female | CaMKII $\delta$ MM281/2VV KI        | ME Anderson Lab, JHMI | C57BL/6J          |                                                                 | Publication cited in paper |
| Parent - Male   | CaMKII $\delta$ cardiac-specific KO | JH Brown Lab, UCSD    | Black Swiss       | It has been crossbred into C57B/6J for more than 10 generations | Publication cited in paper |
| Parent - Female | CaMKII $\delta$ cardiac-specific KO | JH Brown Lab, UCSD    | Black Swiss       | It has been crossbred into C57B/6J for more than 10 generations | Publication cited in paper |
| Parent - Male   | CaMKII $\delta$ global KO           | JH Brown Lab, UCSD    | C57BL/6J          |                                                                 | Publication cited in paper |
| Parent - Female | CaMKII $\delta$ global KO           | JH Brown Lab, UCSD    | C57BL/6J          |                                                                 | Publication cited in paper |

### Antibodies

| Target antigen  | Vendor or Source                     | Catalog # | Working concentration | Lot # (preferred but not required) | Persistent ID / URL                                                                                                                                                                                                                                                                                                                                                  |
|-----------------|--------------------------------------|-----------|-----------------------|------------------------------------|----------------------------------------------------------------------------------------------------------------------------------------------------------------------------------------------------------------------------------------------------------------------------------------------------------------------------------------------------------------------|
| CaMKII $\delta$ | custom, ZYMED Inc, San Francisco, CA | N/A       | WB, 1:15,000          |                                    | Huke S, Bers DM. Temporal dissociation of frequency-dependent acceleration of relaxation and protein phosphorylation by CaMKII. <i>J Mol Cell Cardiol.</i> 2007;42(3):590-9. doi: 10.1016/j.yjmcc.2006.12.007<br><a href="https://www.jmcc-online.com/article/S0022-2828(06)01075-3/fulltext">https://www.jmcc-online.com/article/S0022-2828(06)01075-3/fulltext</a> |
| CaMKII $\delta$ | Badrilla                             | A010-56AP | IP, 1:10              |                                    | <a href="https://badrilla.com/camkii-delta-isoforms-2-3-4-9-11-11a-pab.html">https://badrilla.com/camkii-delta-isoforms-2-3-4-9-11-11a-pab.html</a>                                                                                                                                                                                                                  |
| O-GlcNAc        | Millipore                            | MABS1254  | WB, 1: 10,000         |                                    | <a href="https://www.emdmillipore.com/US/en/product/Anti-O-GlcNAc-Antibody-clone-CTD110.6,MM_NF-MABS1254">https://www.emdmillipore.com/US/en/product/Anti-O-GlcNAc-Antibody-clone-CTD110.6,MM_NF-MABS1254</a>                                                                                                                                                        |
| O-GlcNAc        | Abcam                                | ab2739    | WB, 1:1,000           |                                    | <a href="https://www.abcam.com/o-linked-n-acetylglucosamine-antibody-rl2-ab2739.html">https://www.abcam.com/o-linked-n-acetylglucosamine-antibody-rl2-ab2739.html</a>                                                                                                                                                                                                |

DOI [to be added]

|                                                                 |                          |            |              |  |                                                                                                                                                                                                                                                 |
|-----------------------------------------------------------------|--------------------------|------------|--------------|--|-------------------------------------------------------------------------------------------------------------------------------------------------------------------------------------------------------------------------------------------------|
| oxidized-CaMKII (Met281/282)                                    | Millipore                | 07-1387    | WB, 1:2,500  |  | <a href="https://www.emdmillipore.com/US/en/product/Anti-oxidized-CaM-Kinase-II-Met281-282-Antibody,MM_NF-07-1387">https://www.emdmillipore.com/US/en/product/Anti-oxidized-CaM-Kinase-II-Met281-282-Antibody,MM_NF-07-1387</a>                 |
| phospho-CaMKII (Thr286)                                         | Thermo Fisher Scientific | MA1-047    | WB, 1:1,000  |  | <a href="https://www.thermofisher.com/antibody/product/Phospho-CaMKII-alpha-Thr286-Antibody-clone-22B1-Monoclonal/MA1-047">https://www.thermofisher.com/antibody/product/Phospho-CaMKII-alpha-Thr286-Antibody-clone-22B1-Monoclonal/MA1-047</a> |
| PLB                                                             | Badrilla                 | A010-14    | WB, 1:5,000  |  | <a href="https://badrilla.com/phospholamban-pln-plb-mab-clone-a1.html">https://badrilla.com/phospholamban-pln-plb-mab-clone-a1.html</a>                                                                                                         |
| PLB                                                             | Thermo Fisher Scientific | PA5-82945  | WB, 1:1,000  |  | <a href="https://www.thermofisher.com/antibody/product/Phospholamban-Antibody-Polyclonal/PA5-82945">https://www.thermofisher.com/antibody/product/Phospholamban-Antibody-Polyclonal/PA5-82945</a>                                               |
| PLB pS16                                                        | Badrilla                 | A010-12AP  | WB, 1:5,000  |  | <a href="https://badrilla.com/phospholamban-pln-plb-pser16-pab.html">https://badrilla.com/phospholamban-pln-plb-pser16-pab.html</a>                                                                                                             |
| PLB pT17                                                        | Badrilla                 | A010-13    | WB, 1:5,000  |  | <a href="https://badrilla.com/phospholamban-pln-plb-pthr17-pab-serum.html">https://badrilla.com/phospholamban-pln-plb-pthr17-pab-serum.html</a>                                                                                                 |
| RyR                                                             | Thermo Fisher Scientific | MA3-916    | WB, 1:1,000  |  | <a href="https://www.thermofisher.com/antibody/product/Ryanodine-Receptor-Antibody-clone-C3-33-Monoclonal/MA3-916">https://www.thermofisher.com/antibody/product/Ryanodine-Receptor-Antibody-clone-C3-33-Monoclonal/MA3-916</a>                 |
| RyR pS2814                                                      | custom                   | N/A        | WB, 1:1,000  |  | Gift from Dr. Xander H.T. Wehrens, Baylor College of Medicine, Houston, TX, USA<br><a href="https://www.ahajournals.org/doi/10.1161/CIRCULATIONAHA.110.982298">https://www.ahajournals.org/doi/10.1161/CIRCULATIONAHA.110.982298</a>            |
| GAPDH                                                           | GeneTex                  | GTX627408  | WB, 1:5,000  |  | <a href="https://www.genetex.com/Product/Detail/GAPDH-antibody-GT239/GTX627408">https://www.genetex.com/Product/Detail/GAPDH-antibody-GT239/GTX627408</a>                                                                                       |
| GAPDH                                                           | Millipore                | AB2302     | WB, 1:5,000  |  | <a href="https://www.emdmillipore.com/US/en/product/Anti-GAPDH-Antibody,MM_NF-AB2302">https://www.emdmillipore.com/US/en/product/Anti-GAPDH-Antibody,MM_NF-AB2302</a>                                                                           |
| goat anti-mouse IgG (H+L) secondary antibody, HRP               | Thermo Fisher Scientific | 31430      | WB, 1:5,000  |  | <a href="https://www.thermofisher.com/antibody/product/Goat-anti-Mouse-IgG-H-L-Secondary-Antibody-Polyclonal/31430">https://www.thermofisher.com/antibody/product/Goat-anti-Mouse-IgG-H-L-Secondary-Antibody-Polyclonal/31430</a>               |
| goat anti-rabbit IgG (H+L) secondary antibody, HRP              | Thermo Fisher Scientific | 31460      | WB, 1:5,000  |  | <a href="https://www.thermofisher.com/antibody/product/Goat-anti-Rabbit-IgG-H-L-Secondary-Antibody-Polyclonal/31460">https://www.thermofisher.com/antibody/product/Goat-anti-Rabbit-IgG-H-L-Secondary-Antibody-Polyclonal/31460</a>             |
| goat anti-chicken IgY (H+L) secondary antibody, Alexa Fluor 488 | Thermo Fisher Scientific | A-11039    | WB, 1:5,000  |  | <a href="https://www.thermofisher.com/antibody/product/Goat-anti-Chicken-IgY-H-L-Secondary-Antibody-Polyclonal/A-11039">https://www.thermofisher.com/antibody/product/Goat-anti-Chicken-IgY-H-L-Secondary-Antibody-Polyclonal/A-11039</a>       |
| goat anti-mouse IgG secondary antibody                          | LI-COR                   | IRDye800CW | WB, 1:10,000 |  | <a href="https://www.licor.com/bio/reagents/irdye-800cw-goat-anti-mouse-igg-secondary-antibody">https://www.licor.com/bio/reagents/irdye-800cw-goat-anti-mouse-igg-secondary-antibody</a>                                                       |
| goat anti-rabbit IgG secondary antibody                         | LI-COR                   | IRDye680RD | WB, 1:10,000 |  | <a href="https://www.licor.com/bio/reagents/irdye-680rd-goat-anti-rabbit-igg-secondary-antibody">https://www.licor.com/bio/reagents/irdye-680rd-goat-anti-rabbit-igg-secondary-antibody</a>                                                     |
| goat anti-                                                      | LI-COR                   | IRDye800   | WB, 1:10,000 |  | <a href="https://www.licor.com/bio/reagents/irdye-">https://www.licor.com/bio/reagents/irdye-</a>                                                                                                                                               |

DOI [to be added]

|                               |  |    |  |  |                                                               |
|-------------------------------|--|----|--|--|---------------------------------------------------------------|
| rabbit IgG secondary antibody |  | CW |  |  | <a href="#">800cw-goat-anti-rabbit-igg-secondary-antibody</a> |
|-------------------------------|--|----|--|--|---------------------------------------------------------------|

### DNA/cDNA Clones

| Clone Name                                      | Sequence                                                                                                                                                                                                                                                                                                                                                                                                                                                                                                                                                                                                                                                                                                                                                                                                                                                                                                                                                                                                                                                                                                                                                                                                                                                                                                                                                                                                                                                                                                                                                                                                                                                                                                                                                                                                                                                                                                                                                                                                                                                                                                                                                                                                                                                                                                                                                                                                                                                                                                                                                                                                                                                                                                                                                                                                                                                                                                                                                                                                                                                                                                                                                                                                                                                                                                                                                                                                                                                           | Source / Repository                                                                                                                                     | Persistent ID / URL                                                                                                                                                                                                                                                                                                                                                                               |
|-------------------------------------------------|--------------------------------------------------------------------------------------------------------------------------------------------------------------------------------------------------------------------------------------------------------------------------------------------------------------------------------------------------------------------------------------------------------------------------------------------------------------------------------------------------------------------------------------------------------------------------------------------------------------------------------------------------------------------------------------------------------------------------------------------------------------------------------------------------------------------------------------------------------------------------------------------------------------------------------------------------------------------------------------------------------------------------------------------------------------------------------------------------------------------------------------------------------------------------------------------------------------------------------------------------------------------------------------------------------------------------------------------------------------------------------------------------------------------------------------------------------------------------------------------------------------------------------------------------------------------------------------------------------------------------------------------------------------------------------------------------------------------------------------------------------------------------------------------------------------------------------------------------------------------------------------------------------------------------------------------------------------------------------------------------------------------------------------------------------------------------------------------------------------------------------------------------------------------------------------------------------------------------------------------------------------------------------------------------------------------------------------------------------------------------------------------------------------------------------------------------------------------------------------------------------------------------------------------------------------------------------------------------------------------------------------------------------------------------------------------------------------------------------------------------------------------------------------------------------------------------------------------------------------------------------------------------------------------------------------------------------------------------------------------------------------------------------------------------------------------------------------------------------------------------------------------------------------------------------------------------------------------------------------------------------------------------------------------------------------------------------------------------------------------------------------------------------------------------------------------------------------------|---------------------------------------------------------------------------------------------------------------------------------------------------------|---------------------------------------------------------------------------------------------------------------------------------------------------------------------------------------------------------------------------------------------------------------------------------------------------------------------------------------------------------------------------------------------------|
| GFP-tagged CaMKII $\delta$ C WT pShuttle vector | gctcatttttaaccaataggccgaaatcggcaaaatcccttataaatcaaaagaatagaccgagatagggtt<br>gagtgtgtccagtttggaaacaagagtcactattaaagaacgtggactccaacgtcaaagggcgaaaaacc<br>gtctatcagggcgatggccactacgtgaacatcacctaatcaagtttttggggtcgagggtgccgtaaagc<br>actaaatcggaaaccctaaaggagccccgatttagagcttgacggggaaagccggcgaacgtggcgagaa<br>aggaagggaaagaaagcgaaggagcggcgctagggcgctggcaagtgtagcgggtcacgctgcgtaac<br>caccacaccgccgcttaatgcgctcagggcgctcattcgccattcaggatcgaattaattcttaa<br>ttaacatcatcaataatataccttatttggattgaagccaatgataatgagggggtggagtttggcagctgg<br>cgcggggctgggaacggggcggtgacgtagtagtggtggcgaagtgtgatgttcaagtgtggcgaaca<br>catgtaagcgacggatgtggcaaaagtacgttttgggtgctgcccgtgtacacaggaagtacaatttccg<br>gctgttttagggcgatgtttagtaaatggggcgaaccgagtaagattggccatttccggggaaactga<br>ataagaggaagtgaatctgaataatttggcttactcatagcgcgtaataactgtaataagtaatacattacggg<br>gtcattagttcatagccatataatggagttccgcttacataactacggtaaatggcccctggctgaccgcc<br>caacgaccccccccattgacgtcaataatgacgtatgttccatagtaacccaatagggactttcattgac<br>gtcaatgggtggagatttacggtaaactgccacttggcagtagatcaagtgtatcatatgccaagtacgcc<br>cctattgacgtcaatgacggtaaatggcccctggcattatgccagtagatgacctatgggactttcctact<br>tggcagtagatctactgattagctatgctattaccatggtagcgggtttggcagtagatcaatggcggtgga<br>tagcgggtttagctcacggggattccaagtctcacccttagcgtcaatgggagttgtttggcaccaaaat<br>caacgggactttcaaaatgtcgtaaactccgcccattgacgcaaatggcggttagcgtgtagcgggtggg<br>aggtctataagcagagctggttttagtaaccgtcagatccgctagagatcgtctaaagctgctgcagga<br>attcgctgtcgcctcgcactgtccagaccccccatggcttccgggagctccttatccgtacgacgtccctga<br>ctacgccggacctggagctcagctgaccaccctgcacccggttaccgacgagtagatcagctcttcgaggag<br>ctcggaaaggggacttctcagtggtgagaagatgcatgaaatccctactggacaagagtagctgcaaaa<br>attatcaacacaaaagcttctgctagggatcatcagaaactggaagggaagctagaatctgcctctctt<br>gaagcaccatattgtgagacttcatgacagcatatccgaagagggttccattacttggtgtttgacttagt<br>tactggtggcgaactcttgaagacatagtggaagagaatattacagtggagctgatgccagtcattgtatac<br>aacagattctagagagtgaaatcattgtcacctaaatggcatagttcacaggacctaagcctgagaatttg<br>cttttagctagcaaatcaaaaggagcagctgtgaaactggcagacttccgcttagccatagaagtcaaggcg<br>accagcaggcgtggtttggtttgctggcacacctgggtatcttctcagaagctcactgtaaagatcctatg<br>gaaaaccagtggacatgtgggcatgtggcgtcatcctctacatcttctggtgggataccacccttctgggat<br>gaagatcagcatagactgtatcagcagatcaaggctggagcgtacgatttccatcaccagaatgggacaca<br>gtgacacctgaagcacaagacctcatcaaaaatgctgacctcaacctgcaaacgcatcacagcctctg<br>aggcctgaaacaccatggatctgtcaacgttctactgttgcctcatgatgcagggcaggagactgtagac<br>tgcttgaagaaatattatgctcgacggaattgaagggtccatcttgacaactatgctggctacgagaaat<br>ttcagcagcaagagtttgaagaaaccggatggggtaaaggagtcaactgagagctcaaataccaccatt<br>gaggatgaagcgtgaaagcagcaagcaagagatcatcaaaactgactgagcagctgattgaagctatcaa<br>caatggggactttaggcttacacgaaaatctgtgatccaggcctactgcttgaaccgaagcattggggca<br>acttagtggaggatggactttcacagattctattgaaaatgcttgcacaaaatcaataaaccaatccac<br>actatcatcctgaacctcactgacacctgtaggggatgatgcagcctgcatagcatacattcggtcacaca<br>gtacatggatggaatggaatgcaaaagacaatgacgtcagaagagactcagagtggcaccgctgatgg<br>gaagtggcagaatattcatttcatcgttccgggtcccaacagtcacctcaagccacctgtattcacaatg<br>ggaaagaaaacttctcaggaggcaccttctgtgcaaaaacatcgaaaaccattcacatttgggtcagcgg<br>accgcccggggatccaccggtcgcaccatggtgagcaagggcaggagctgttaccgggggtggtgcc<br>catcctgctgagctggagcgcagtaaacggccaagttcagcgtgtccggcagggcgagggcgatgc<br>cacctacggcaagctgacctgaagttcatctgaccaccggcaagctgcccgtgcccctggcccacctcgtga<br>ccacctgacctacggcgtgagtgctttagcggctaccccgaccatgaagcagcagcacttctcaagctc | CaMKII constructs were based off the rat CaMKII $\delta$ sequence. GFP-tagged probe was generated using the AdEasy system (Addgene, Watertown, MA, USA) | Wood BM, Simon M, Galice S, Alim CC, Ferrero M, Pinna NN, Bers DM, Bossuyt J. Cardiac CaMKII activation promotes rapid translocation to its extra-dyadic targets. <i>J Mol Cell Cardiol.</i> 2018;125:18-28. doi: 10.1016/j.jmcc.2018.10.010. <a href="https://www.jmcc-online.com/article/S0022-2828(18)31023-X/fulltext">https://www.jmcc-online.com/article/S0022-2828(18)31023-X/fulltext</a> |

gcatgcccgaaggctacgtccaggagcgcaccatcttcttcaaggacgacggcaactacaagaccgccc  
gaggtgaagttcagggcgacacccctgggtaaccgcatcgactgaagggcatcgactcaaggaggacggc  
aacatcctggggcacaagctggagtacaactacaacagccacaacgtctatatcatggcgcacaagcagaag  
aacggcatcaagggaactcaagatccgccacaacatcaggagcggcagcgtgcagctcggcaccactac  
cagcagaacacccccatcggcgacggccccgtgctgctcccgaacactacctgagcaccagtcacaag  
ctgagcaaaagaccccaacgagaagcgcatcacatggctctgctggagttcgtgacggcggcgggatcactc  
tcggcatggacgagctgtacaagtaagcggcggctcagcctaagctttagataagatatccgatccaccg  
gttctagataactgatcataatcagccataccacattttagaggttttacttgcttaaaaaaacctccacact  
cccctgaacctgaacataaaatgaatgcaattgttggtaactgtttattgagcctataatggttcaaaa  
taaagcaatagcatcacaatttcacaaaataagcatttttttactgcattctagtgtggtttgtccaaactca  
tcaatgtatcttaacgcggatctggcggtgtaagggtgggaaagaatataagtggggggtcttatgtagt  
tttgtatctgtttgcagcagccgcccggccatgagcacaactcgttgatggaagcattgtgagctcatatt  
gacaacgcgcatgccccatggcgggggtcgtcagaatgtgatgggctccagcattgatggtcggccgctc  
ctgcccgaactctactaccttgacctacgagaccgtgtctggaacggcgttgagactgcagcctccggcgc  
cgcttcagccgctgcagccaccgcccgggattgtgactgactttgcttctgagcccgcttgaagcagtg  
agcttcccgttcatcccccgatgacaagttgacggctctttggcacaattggattctttgaccgggaactt  
aatgtcgtttctcagcagctgttgatctgcgcagcaggtttctccctgaaggcttctcccctccaatgagg  
tttaaaacataataaaaaaacagactctgtttggatttgatcaagcaagtgtctgtctttatttaggggt  
tttgcgcgcggttaggccgggaccagcggctcggctggtgagggtcctgtgatttttcaggacgtggta  
aagtgactctggatgtcagatacatgggcataagcccgtcctgggggtggaggtagcaccactgcagagct  
tcatgctcgggggtggtgttagatgatccagctgtagcaggagcgtggcggtgcttaaaaatgtcttt  
cagtagcaagctgattgccaggggagggccttggtgtaagtgtttacaaagcggttaagctgggatgggtgc  
atactggggatagatgatcttgactgtatttttaggttggtatgttccagccataatcccctcggggat  
tcatgttgagcagaaccaccagcagctgatccggctcacttgggaaattgtcatgtagcttagaaggaaat  
gcgtggaagaacttgagacgcccctgtgacctcaagattttccatgacttctccataatgatggcaatggg  
cccacgggcgcgctggcggaagatatttctgggatcactaacgtcatagtgtgttccaggatgagatcgt  
cataggccattttacaaagcggcggggaggggtccagactgcggtataatggttccatccggcccaggggc  
gtagttaccctcacagatttgatttcccacgctttgagttcagatggggggatcatgtctacctgccccgcat  
gaagaaaacggtttccgggtaggggagatcagctgggaagaaagcaggttctgagcagctgcgacttacc  
gcagccggtgggcccgtaaatcacacctattaccggctgcaactggtagttaaagagagctgcagctcggctca  
tccctgagcagggggccacttcttaagcatgctcctgactcgcagttttccctgaccaaataccgcagaag  
gcgctcggcccagcagatagcagttctgcaaggaagcaaagttttcaacgggttgagaccgtccgctgtag  
gcatgctttgagcgtttgaccaagcagttccaggcggctccacagctcggctcactgctcaccgcatctcgat  
ccagcatalctcctgcttcgccccgtggggcggcttctgctgacggcagtagctgggtcctcctcagacgggc  
cagggctcatgtctttcacggcgagggctcctcgtcagcgtagctgggtcacggtaagggggtgcgctccgg  
gctgcgctgcccaggggtgcgctgaggctggtcctgctggtgctgaagcgtcgggtcttcgcccgtcgcgt  
cggccaggtagcatttgaccatgggtgcatagtcagcccctccgcggtggcccttggcgcgagcttccc  
ttggaggaggcgcgcagaggggagctgcagacttttagggcgtagagcttggcgcgagaaataccgat  
tccggggagtaggcatccgcggcagggccccgagacggctcgcattccacgagccaggtgagctctggcc  
gttcggggcaaaaaacaggtttccccatgctttttgatgcttttcttacctggtttccatgagccggtgtcca  
cgctcggtagcaaaaaggctgtccgtgtccccgtatacagacttgagaggagtttaaagcaattcaatagctt  
gttgcagggcgccgataaaaatgcaaggtgctgctcaaaaaatcaggcaaaagcctcgcgcaaaaaagaa  
agcacatcgtatgctcatgagataaaggcaggttaagctccggaaccaccacagaaaaagacaccatt  
tttctcaaacatgctcgggtttctgcataaacacaaaaataaaatacaaaaaaacatttaaaccattagaa  
gcctgtcttacaacaggaaaaaacaccttataagcataagacggactacggccatgccggcgtgaccgtaa  
aaaaactggtcaccgtgattaaaaagcaccacagcagctcctcggctatgtccggagtcataatgtaagact  
cggtaaacacatcaggttgattcacatcggctagctctaaaaagcagccgaaatagccccgggggatacata  
cccgcaggcgtagagacaacattacagccccatagagggtataacaaaattaataggagagaaaaacaca  
taaacacctgaaaaacctctgcttagcaaaatagcaccctccgctccagaacaacatacagcgttcca  
cagcggcagccataacagtcagccttaccagtaaaaaagaaaacctataaaaaaacaccactgcacaggg  
caccagctcaatcagtcagtgtaaaaaaggccaagtgcagagcaggtatataatagactaaaaaatgac  
gtaacggttaaagtcacaaaaaacaccagaaaaccgcagcaacactacgccagaaaacgaaagccaa  
aaaaccacaacttctcaatcgtcacttccgtttccacgttactcacttccatttaagaaaactacaat

|                                               |                                                                                                                                                                                                                                                                                                                                                                                                                                                                                                                                                                                                                                                                                                                                                                                                                                                                                                                                                                                                                                                                                                                                                                                                                                                                                                                                                                                                                                                                                                                                                                                                                                                                                                                                                                                                                                                                                                                                                                                                                                                                                                                                                                                                                                                                                                                                                                                                                                                                                                                                                                                                                                                                                                                                                                                                                                                        |  |  |
|-----------------------------------------------|--------------------------------------------------------------------------------------------------------------------------------------------------------------------------------------------------------------------------------------------------------------------------------------------------------------------------------------------------------------------------------------------------------------------------------------------------------------------------------------------------------------------------------------------------------------------------------------------------------------------------------------------------------------------------------------------------------------------------------------------------------------------------------------------------------------------------------------------------------------------------------------------------------------------------------------------------------------------------------------------------------------------------------------------------------------------------------------------------------------------------------------------------------------------------------------------------------------------------------------------------------------------------------------------------------------------------------------------------------------------------------------------------------------------------------------------------------------------------------------------------------------------------------------------------------------------------------------------------------------------------------------------------------------------------------------------------------------------------------------------------------------------------------------------------------------------------------------------------------------------------------------------------------------------------------------------------------------------------------------------------------------------------------------------------------------------------------------------------------------------------------------------------------------------------------------------------------------------------------------------------------------------------------------------------------------------------------------------------------------------------------------------------------------------------------------------------------------------------------------------------------------------------------------------------------------------------------------------------------------------------------------------------------------------------------------------------------------------------------------------------------------------------------------------------------------------------------------------------------|--|--|
|                                               | <p>tccaacacatacaagttactccgccctaaaacctacgtcaccgcgccgttcccacgccccgcgccacgtcac<br/> aaactcccccctcattatcatattggcttcaatccaaaataaggtatattattgatgatgtaattaacatgca<br/> tggatccatattgagggtgaaataaccgcacagatgcgtaaggagaaaataccgcatcaggcgtcttccgctt<br/> cctcgctcactgactcgctcgctcggctgctcggctcggcgagcggtatcagctcactcaaaggcgtaata<br/> cggttatccacagaatcaggggataacgcaggaagaacatgtgagcaaaaggccagcaaaaggccagga<br/> accgtaaaaaggccgctgtgctggtttttccataggctccgccccctgacgagcatcacaanaatcgacg<br/> ctcaagtcaagggtggcgaacccgacaggactataaagataaccaggcgtttcccctggaagctccctcgtg<br/> cgctcctgttccgacctgcccgttaccggatacctgtccgctttctcctcgggaagcgtggcgctttctca<br/> tagctcacgctgtaggtatctcagttcgggtgtaggtcgtcctcaagctgggctgtgtgcacgaacccccgt<br/> tcagcccagccgctgctccttaccgtaactatcgtcttgagccaacccgtaagacacgacttatcgccact<br/> ggcagcagccactggttaacaggattagcagagcgaggatgtaggcggtgctacagagttctgaagtgtg<br/> gcctaactacggctacactagaaggacagatatttggtatctgcgctctgctgaagccagtaccttcgaaaa<br/> gagttggtgactcttgatccggcaaacacaccgctggtagcgggtggttttttggcaagcagcagatta<br/> cgcgcaaaaaaaggatctcaagaagatcctttgatctttctacgggctgacgctcagtggaacgaaaa<br/> ctcagttaaagggattttggtcatgagattataaaaaggatcttcacctagatccttttaataaaaaatgaag<br/> tttaaatcaatctaaagtatatatgagtaaaacttggtctgacagttaccaatgcttaacagtgaggcacctat<br/> ctcagcgtctgtctatttcttcatccatagttgctgactccccgctgtagataactacgatacgggaggg<br/> cttaccatctggccccagtgctgcaatgataaccgcgagaccacgctcaccggctccagatttatcagcaataa<br/> accagccagccggaagggccgagcgcagaagtggctcgaactttatccgctccatccagcttataattgt<br/> tgccgggaagctagagtaagtagttgccagttaatagtttgcgcaacgttggccattgctgcagccatgag<br/> attatcaaaaaggatcttcacctagatcctttcacgtagaaagccagtcgcgaaaacgggtgctgacccccg<br/> atgaatgtcagctactgggctatctggacaagggaaaacgcaagcgaagagaaagcaggtagcttgagct<br/> gggcttacatgggatagctagactgggctggtttatggacagcaagcgaacccggaattgacagctggggcgc<br/> cctctggaaggttgggaagccctgcaaaagtaaaactggatggcttcttccgccaaggatctgatggcgagg<br/> ggatcaagctctgataagagacaggatgaggatcgtttcgcagattgaacaagatggattgacgcaggtt<br/> ctccggcgttgggtggagaggctattcggctatgactgggcacaacagacaatcggctgctctgatgccgc<br/> gtgtccggctgtcagcgcagggcgccccggttcttttcaagaccgacctgtccggtgccctgaatgaactg<br/> caagacgaggcagcgcgctatcgtggctggccacgacggcgctccttgcgagctgtgctcagctgtgca<br/> ctgaagcgggaagggactggctgctattggcgaaagtccggggcaggatctcctgtcatctcacctgtcct<br/> gccgaaaagtatccatcatggctgatgcaatgcggcggctgatacgttgatccggctacctgcccattcga<br/> ccaccaagcgaacatcgcatcgagcagcagctactcggatggaagccggtcttgcgatcaggatgatctg<br/> gacgaagagcatcaggggctcgcgcagccgaactgttcgacaggctcaaggcagcatgccgacggcga<br/> ggatctcgtgtaaccatggcgatgctgcttgcgaatatcatggtggaanaatggccgctttctggattcat<br/> cgactgtggccgctgggtgtggcgaccctatcaggacatagcgttggtaccctgatattgctgaagag<br/> cttggcggaatgggctgaccgcttctcgtgctttacggatcgcgctcccgattcgcagcgcacgcttct<br/> atcgcttctgacgagttcttgaatgtttaaattttgttaaatca</p> |  |  |
| <p>GFP-<br/>tagged<br/>CaMKIIδC<br/>S280A</p> | <p>gctcatttttaaccaataggccgaaatcgcaaaatccctataaatcaaaagaatagaccgagatagggtt<br/> gagtggttccagtttgaacaagagtcactataaagaacgtggactccaacgtcaaagggcgaanaaac<br/> gtctatcagggcgatggccactacgtgaacatcacctaatacaagttttggggtcgagggtccgtaaac<br/> actaaatcgaacccataaaggagccccgatttagagcttgacgggaaagccggcgaacgtggcgagaa<br/> aggaagggaaagaaagcgaaggagcggcgctagggcgctggcaagtgtagcggctcacgctgcgtaac<br/> caccacaccgccgcttaatgcgctacagggcgctcattcgcattcaggatcgaattaattcttaa<br/> ttaacatcatcaataatataccttattttgattgaagccaatataatgagggggtggagtttggactgg<br/> cgcgggcgctgggaacggggcggtgacgtagtagtggcggaagtgtgatgttcaagtgtggcgaaca<br/> catgtaagcgacggatgtggcaaaagtacgtttttgggtgctgcccgggtgacacaggaagtgaatttcgc<br/> gggttttagcggatgtttagtaaatggggcgaaccgagtaagattggccattttcggggaaaactga<br/> ataagaggaagtgaatctgaataatgtgttactcatagcgcgtaataactgtaataagtaatacattcggg<br/> gtcattagttcatagccatataatggagttccgcttacataactacggtaaatggcccctggctgacggc<br/> caacgacccccgccattgacgtcaataatgacgtatgtccatagtaacgcaatagggactttcattgac<br/> gtcaatgggtggagattttacggtaaaactgccacttggcagtaacatcaagtgtatcatatgccaagtaacccc<br/> cctattgacgtcaatgacggtaaatggcccctggcattatgccagatcatgaccttatgggactttctact<br/> tggcagtaacatctacgtattagctatcgtattaccatgggtgatgcggttttggcagtaacatggcggtgga<br/> tagcgggttactcaggggattccaagtctccaccattgacgtcaatgggagttgtttggcaccnaaat</p>                                                                                                                                                                                                                                                                                                                                                                                                                                                                                                                                                                                                                                                                                                                                                                                                                                                                                                                                                                                                                                                                                                                                                                                                                                                                                                                                                                                                                                                                                                                     |  |  |

caacgggactttccaaaatgtcgtacaactccgccattgacgcaaatggggcgtaggcgtgtacgggtggg  
aggctatataagcagagctggttagtaacctgcagatccgctagagatctgctctaaagctgctgcagga  
attcgcgtgtcggcgtgcactgtccagaccccccatggcttcgggagctccttatccgtacgacgtccctga  
ctacgccggacctggagctcagctgaccaccctgcacccggttaccgacgagatcagctcttcgaggag  
ctcggaaagggggcattctcagtggtgagaagatgcatgaaaatccctactggacaagagatgctgcca  
attatcaacaccaaaaagcttctgctagggatcatcagaaaactggaaaggggaagctagaatctgccgtctt  
gaagcaccacaatattgtgagacttcatgacagcatatccgaagagggttccattacttgggtgttgacttagt  
tactggtggcgaactcttgaagacatagtggaagagaatattacagtgaggctgatgccagtcattgtatac  
aacagattctagagagtgaaatcattgtcacctaaatggcatagttcacaggacctgaagcctgagaattg  
cttttagctagcaaatccaaaggagcagctgtgaaactggcagactcggcttagccatagaagtcaaggcg  
accagcaggcgtggttggtttggctggcacacctgggtatcttctcagaagtctacgtaaagatccttatg  
gaaaaccagtggacatgtgggcatgtggcgtcatcctctacatctgtggtgggataccacccttctgggat  
gaagatcagcatagactgtatcagcagatcaaggctggagcgtacgattttccatcaccagaatgggacaca  
gtgacacctgaagccaaagacctcatcaacaaaatgctgacatcaacctgccaacgcacatcacagcctg  
aggcctgaaacacctggtatctgtcaacttctactgttggccatgatgacaggcaggagactgtaga  
ctgcttgaagaaatataatgctcagcgaatgaagggtgcatcttgacaactatgctggctacgagaat  
ttcagcagccaagagttgtgaagaaaccggatggggtaaaggagtcaactgagagctcaataaccacat  
tgaggatgaagacgtgaaagcacgaaagcaagagatcatcaaatgactgagcagctgattgaagctatca  
acaatggggacttcgaggcttacacgaaaatctgtgatccaggcctcactgccttgaaccgaagcattgggc  
aacttagtggaaggatggactttcacagattctacttgaatgcttggccaaaatcaataaaccaatcca  
cactatcatcctgaacctcagctacacctggtaggggatgatgacgctcatagcatacattcggctcacac  
agtacatggatggaaatggaatgccaagacaatgagtcagaagagactcagagtggtggcaccgctgatg  
ggaagtggcagaatattcatttcatcgttcgggggtcccaacagtccccatcaagccacctgtattccaaat  
gggaaagaaaacttccaggaggcacctcttggcgaacatcggaaccattcacatttgggtcagcgg  
taccgggggccgggatccaccggtgccaccatggtagcaagggcgaggagctgttaccgggggtggtgc  
ccatcctggtcagctggacggcgacgtaaacggccacaagttagcgtgtccggcgagggcgaggggcagtg  
ccacctacggcaagctgacctgaagttcatctgaccaccggcaagctgcccgtgcccctggccacctcgtg  
accacctgacctacggcgtgagtgctcagccgctacccgaccacatgaagcagcagcacttctcaagtc  
cgccatgccgaaggctacgtccaggagcgaccatcttctcaaggacgacggcaactacaagaccgctgc  
cgaggtgaagttcagggcgacacctggtaaccgcatcagctgaagggcatcagcttcaaggaggacgg  
caacatcctggggcacaagctggagtacaactacaagccacaacgtctatatcatggccgacaagcagaa  
gaacggcatcaaggtgaactcaagatccgccacaacatcaggacggcagcgtgagctcggcaccacta  
ccagcagaacacccccatcgcgacggccccgtgctgctcccgaaccactacctgagcaccagtcaca  
gctgagcaaaagacccaacgagaagcgcatcacatggtcctgctggagttcgtgaccgcccgggatcac  
tctcgcatggacgagctgtacaagtaagcggccgctcagcctaagcttctagataagatatccgatccac  
cggttctagataactgatcataatcagccataccacattgtagaggtttacttgccttaaaaaacctcccaca  
ctccccctgaacctgaaacataaaatgaatgcaattgttgttaacttgttattgagcttataatggttac  
aaataaagcaatagcatcacaatccacaataaagcatttttctactgattctagttgtggttgcctaaa  
ctcatcaatgtatcttaacggatctggcggtggttaaggggtggaaagaatataaaggtgggggtcttatg  
tagttttgtatctgtttgacgagcgcggccgcatgagcaccactcgttggatggaagcattgtgagctcat  
attgacaacgcgcatccccatgggcccgggtgctgagaaatgtatgggctcagcattgatggtcggccc  
gtcctgcccgaactctactacctgacctacgagaccgtgctggaacgcccgttgagactgacgctccgc  
cgccgctcagccgctgacgccaccgcccgggattgtgactgacttgccttctgagcccgttgcaagcag  
tgcagcttcccgttcatcccgcgatgacaagttgacggctcttggcacaattggattcttggaccggga  
acttaatgctgttctcagcagctgttgatctgcccagcaggttctgcccgaaggcttctcccctccaat  
gggtttaaacaataaaaaaacagactctgttggattggatcaagcaagtcttctgctgtctttat  
ggggtttgcgcgcggttagccgggaccagcggtctcggtcgttggggctcctgtgatttttccaggacg  
tgtaaaaggtgactctggatgtcagatacatgggcataagcccgtctctggggtggaggtgacccactgca  
gagcttcatgctcgggggtggtgttagatgatccagtcgtagcaggagcgtgggctggtgcctaaaaat  
gtcttctagtagcaagctgattgccaggggacggcccttgggtgaaggtttcaaaagcggtaagctgggatg  
gggtcatacgtggggatagatgcatcttgactgtatttttaggttggctatgtccagccatatccctccg  
gggattcatgttgcagaaccaccagcacagtgatccggtgacttgggaaattgtcatgtagcttagaag  
gaaatgcgtggaagaactggagacgccttgtgacctcaagatttccatgattcgcataatgatggca

atgggccacggcgccctggcggaagatatttctgggatcactaacgtcatagttgttccaggatga  
gatcgtcataggccatttttacaagcgcgggcgagggtgccagactcggtataatggttccatccggccc  
agggcgtagttaccctcacagatttgcattcccacgctttgagttcagatgggggatcatgtctacctgagg  
ggcgtagaagaaaagggttccggggtaggggatcagctgggaagaaagcaggttctgagcagctgag  
actaccgagccgggtggcccgtaaatcacacctattaccggctgcaactgtagttaagagagctgagct  
gccgtcatccctgagcagggggccacttcgtaagcatgtccctgactcgcatgtttccctgaccaaaccgc  
cagaaggcgctcgcccccagcgatagcagttcttgcaaggaagcaaagttttcaacggttgagaccgtcc  
gccgtaggcatgctttgagcgtttgaccaagcagttccaggcggtcccacagctcggtcacctgctctacggc  
atctcgatccagcatatctctcgtttcggggttggggcggtttcgctgtacggcagtagtcgggtcgtctca  
gacgggcccagggtcatgtctttccacggcgagggctctctcagcgtagctgggtcacgggtaagggggtg  
cgctccgggctgctgctggccagggtgctgaggctggtcctgctggtgctgaagcgtgcccgttctgc  
cctgctgctggccaggtagcatttgaccatgggtgcatagtcagccccctccggcggtggcccttggcgcg  
agcttcccttggaggagcgccgacagggggcagtgagactttgaggcgtagagcttggcgcgaga  
aataccgattccggggagtaggcatccgcccgcagggccccgcagacgggtctgcattccacgagccagggtg  
agctctggcgttccggggtcaaaaaccaggttccccatgcttttgatgctttctacctctggtttccatgag  
ccggtgtccagctcggtgacgaaaaggctgctcgtgtcccgtatacagacttgagaggagtttaaacgaa  
ttcaatagcttggcatggggcgatataaaatgcaaggtgctgctcaaaaaatcaggcaaacctcgcgc  
aaaaaagaagcacatcgtatgctcatgagataaaggcaggttaagctccggaaccaccacagaaaa  
agacaccattttctcaaacatgtctgcggtttctgcataaacacaaaaataaaataacaaaaaacattta  
aacattagaagcctgtcttacaacaggaaaaaaccttataagcataagacggactacggccatgcccggc  
gtgaccgtaaaaaactggtcaccgtgattaaaaagcaccacagctcctcgggtatgtccggagtcata  
atgtaagactcggtaaacacatcaggttgattcacatcgggtcagtgctaaaaagcagccgaaatagcccggg  
ggaatacatacccgcaggcgtagagacaacattacagccccataggaggataacaaaattaataggaga  
gaaaaacataaacactgaaaaaccctcctgcttaggcaaaatagcacctcccgtccagaacaacata  
cagcgttccacagcggcagcataacagtcagcctaccagtaaaaaagaaaacttataaaaaacacca  
ctcagacggcaccagctcaatcagtcacagtgtaaaaaaggccaaagtcagagcagtagtatatagact  
aaaaatgacgtaacggttaagtccacaaaaaacaccagaaaaaccgcagcgaacctacgccagaaac  
gaaagcaaaaaacccacaactcctcaaatcgtcactcctgtttcccaggtacgtcacttccatttaaga  
aaactacaattccaacacatacaagttactccgcccataaacctacgtcaccgccccgttccaacgccccgc  
gccagtcacaaactcccccctcattatcatattggcttcaatccaaaataaggatattattgatgatgta  
attaacatgcatggatccatattgagggtgaaataccgcacagatgctgaaggagaaaaataccgcatcaggc  
gctcttcgcttctcgtcactgactcgctgctgctcggtcgttcggctgaggcagcggatcagctcactcaa  
aggcggtaatacgggtatccacagaatcaggggataacgcaggaaagaacatgtgagcaaaaggccagcaa  
aaggccaggaaccgtaaaaaggccggtgctggcgttttccataggctccgccccctgacgagcatcaca  
aaaatcgacgctcaagtcagagggtggcgaaccgacaggactataaagataccaggcgtttcccctggaa  
gctccctcgtgctcctcgttccgacctgcccgttaccggatacctgtccgcttctcccttccggaagcgt  
ggcgtttctcatagctcacgctgtaggtatctcagttcgggtgtaggtcgttcgctccaagctgggctgtgac  
gaacccccgttaccgcccagcgtgctccttaccggttaactatcgtcttgagtccaaccggttaagacagca  
cttatcgccactggcagcagccactgtaaacaggattagcagagcagggtatgtaggagggtgctacagagttc  
ttgaagtgggtgctaactacggctacactagaaggacagatatttggtatctgctcgtgtaagccagttac  
cttcggaaaaagagttgtagctcttgatccggcaaacaaaccaccgctgtagcgggtggtttttgttgcaa  
gcagcagattacgagcaaaaaaggatctcaagaagatccttgatctttctacggggtgctgagctcag  
ggaacgaaaactcacgtaagggttttgggtcagagattatcaaaaaggatcttaccctagatcctttaaatt  
aaaaatgaagttttaaatacaatctaaagtatatatgagtaaaactgggtcagagttaccaatgcttaacagtg  
aggcacctatctcagcgtctgtctatttctgctcctcagttgctgactccccgtcgtgtagataactacgat  
acgggagggttaccatctggcccagtgctgcaatgataaccgagacccacgctcaccggctccagattat  
cagcaataaacagccagccggaaggccgagcgcagaagtggtcctgcaactttatccgctccatccagtc  
tattaattgttccgggaagctagagtaagtagttcgccagttaatagtttgcgcaacggttggcattgctgc  
agccatgagattatcaaaaaggatcttaccctagatcctttcacgtagaaagccagtcgcagaaacgggtgct  
gaccccgatgaatgctcagctactgggctatctggacaagggaaaacgcaagcgaagaaagcaggtgta  
gcttgcagtgaggcttaccatggcgatagctagactggcggtttatggacagcaagcgaaccggaattgcca  
ctggggcgcctcgtgtaagggtgggaagccctgcaaaagtaactggatggcttcttgcgccaaggatctga  
tggcgaggggatcaagctctgatcaagagacaggatgaggatcgttccatgattgaacaagatggattgc

|                                  |                                                                                                                                                                                                                                                                                                                                                                                                                                                                                                                                                                                                                                                                                                                                                                                                                                                                                                                                                                                                                                                                                                                                                                                                                                                                                                                                                                                                                                                                                                                                                                                                                                                                                                                                                                                                                                                                                                                                                                                                                                                                                                                                                                                                                                                                                                                                                                                                                                                                                                                                                                                                                                                                                                                                                                                                                                                                                                                                                                                                                                                           |  |  |
|----------------------------------|-----------------------------------------------------------------------------------------------------------------------------------------------------------------------------------------------------------------------------------------------------------------------------------------------------------------------------------------------------------------------------------------------------------------------------------------------------------------------------------------------------------------------------------------------------------------------------------------------------------------------------------------------------------------------------------------------------------------------------------------------------------------------------------------------------------------------------------------------------------------------------------------------------------------------------------------------------------------------------------------------------------------------------------------------------------------------------------------------------------------------------------------------------------------------------------------------------------------------------------------------------------------------------------------------------------------------------------------------------------------------------------------------------------------------------------------------------------------------------------------------------------------------------------------------------------------------------------------------------------------------------------------------------------------------------------------------------------------------------------------------------------------------------------------------------------------------------------------------------------------------------------------------------------------------------------------------------------------------------------------------------------------------------------------------------------------------------------------------------------------------------------------------------------------------------------------------------------------------------------------------------------------------------------------------------------------------------------------------------------------------------------------------------------------------------------------------------------------------------------------------------------------------------------------------------------------------------------------------------------------------------------------------------------------------------------------------------------------------------------------------------------------------------------------------------------------------------------------------------------------------------------------------------------------------------------------------------------------------------------------------------------------------------------------------------------|--|--|
|                                  | <p>acgcaggttctccggcgttgggtggagaggctattcggctatgactgggcacacagacaatcggctgctctgatgccgctgttccggctgtcagcgcagggcgcccggttcttttgtcaagaccgacctgccggtccctgaatgaactgcaagacgaggcagcgcggctatcgtggctggccacgacggcgctccttgcgacgtgtgctcgcgctgactgaagcgggaaggagctggctgctattggcgaaagtccggggcaggatctcctgtcatctcaacctgtcctgccgagaaagtatccatcatggctgatgcaatgcccgggctgcatacgttgatccggctacctgcccattcgaccaccaagcgaacatcgcatcgagcgcagcactcggatggaagccggtcttgcgatcagatgatctggacgaagagcatcaggggctcgcgccagcgaactgttccaggctcaaggcagcatgccgacggcgaggatctcgtcgtgaccatggcgatcctgcttccgaatatcatggtggaatggccgctttctggattcatcactgtgcccggctgggtgtggcgaccgctatcaggacatagcgttggctaccgctgatattgctgaagagctggcggaatgggctgaccgttctcgtgctttacggatcggcctccgattcgagcgcacgccttctatcgcttcttgacgagtcttctgaatttgttaaattttgttaaataca</p>                                                                                                                                                                                                                                                                                                                                                                                                                                                                                                                                                                                                                                                                                                                                                                                                                                                                                                                                                                                                                                                                                                                                                                                                                                                                                                                                                                                                                                                                                                                                                                                                                                                                                                                                                                                                                                                                                                                                                                                                                                                                                                                                                                                                                                                                      |  |  |
| <p>GFP-tagged CaMKIIδC T287A</p> | <p>gctcatttttaaccaataggccgaaatcgcaaaatcccttataaatcaaaagaatagaccgagatagggttgagtgtgttccagtttggaaacagagtcactataaagaacgtggactccaacgtcaaaaggcgaaaaaccgtctatcagggcgatggccactacgtgaacatcacctaatacaagttttggggctcagagtgccgtaaagcactaaatcggaaacctaaaggagccccgatttagagcttgacggggaagccggcgaacgtggcgagaaaggaagggaaagaaagcgaagagcggcgctagggcgctggcaagtgtagcggtcacgctgcgtaaccaccaccccgcgcttaatgcgctcagggcgctccattcgcattcaggatcgaataattcttaattaacatcatcaataatataccttattttggattgaagccaatatgataatgaggggggtggagtttgcgctggcgcgggcgctgggaacggggcggtgacgtagtagtggcggaagtgtgatgttcaagtgtggcggaacacatgtaagcgcagggatgtggcaaaagtgcgtttttgggtgctgcccgggtgacacaggaagtgaattttcgcgctggttttagggcgatgtttagtaaaattggcgtaaccgagtaagattggcattttcggggaaaactgataagaggaagtgaatctgaataattttgtgttactcatagcgcgtaataactgtaataagtaatacattcgggtcattagttcatagccatataatggagttccgcgttacataactacggtaaatggccccgctggctgaccgcccaacgaccccccccattgacgtcaataatgacgtatgttccatagtaacccaatagggactttcattgacgtcaatgggtggagattttacggtaaaactgccacttggcagtagcatcaagtgtatcatatgccaagtagccccctattgacgtcaatgacggtaaatggccccgctggcattatgccagtagcatgaccttatgggactttcctactggcagtagcatctactgatttagtcatcgctattaccatgggtatgctggtttggcagtagcatcaatggcgctggaatagcggttgactcacgggattccaagtctccacccattgacgtcaatgggagtttggcaccaaaatcaacgggactttcaaaatgtcgtaaactccgccattgacgcaaatggcggttagcgtgtacgggtggagggtctataagcagagctggttagtaaccgtcagatccgctagagatctgctctaaagctgctgcaggaattcgcgtgctgcccgtcgcactgtccagaccccccatggcttcgggagctcctatccgtacgacgtccctgactacgccggacctggagctcagctgaccaccctgcacccggtcaccgacgagtagcgtcttcgaggagctcggaaaggggacttctcagtggtgagaagatgcatgaaatccctactggacaagagtagctgccaataatcaacaccaaagccttctgctagggatcatcagaaactggaagggaagctagaatctgccgtcttgaagcaccatattgtgagacttcatgacagcatatccgaagagggttccattacttgggtttgacttagttactggtggcgaactcttgaagacatagtgcaagagaatattacgtgaggctgatccagtcattgtatacaacagatttagagagtgtaaatcattgtcacctaaatggcatagttcacagggacctgaagcctgagaatttcttttagctagcaaatcaaaaggagcagctgtgaaactggcagactcggcttagccatagaagttcaaggcaccagcaggcgtggtttggtttgctggcacacctgggtatcttccagaagctcactgtaaaagatccttaggaaaaccagtgagcatgtggcgtcatcctctacatcttctgctgggtgggataccacccttctgggatgaagatcagcatagactgtatcagcagatcaaggctggagcgtacattttccatcaccagaatgggacacagtgacacctgaagcacaagacctcatcaacaaatgctgacctcaacctgccaacgcacacagcctcaggccctgaaacacctgatctgtcaacgttctactgttgcctcatgatgcagggcaggaggtgtagctgcttgaagaaatattgctcgcagcgaatgaagggtgcatcttgacaactatgctggctacgagaattttcagcagcaagagtttggtaagaaaccggatggggtaaaggagtaactgagagctcaataccaccattgaggatgaagacgtgaaagcagcaagcaagagatcatcaaaactcagcagctgattgaagctatcaacaatggggacttcgaggcttacacgaaaatctgtgatccaggcctcactgctttgaaccgaagcattgggcaactagtggaaggatggactttcacagattctactttgaaaatgcttggccaaaatcaataaaccatccactatcatcctgaacctcactgacacctgtaggggatgatgcagcctgcatagcatacattcggctcacagtagcatggatggaaatggaatgccaagacaatgcagtcagaagagactcgagtgtggcaccgctgatgggaagtggcagaatattcactttcatcgttcggggtcccaacagtcacctcaagccacctgtattcacaatggaaagaaaacttctcaggaggcaccttcttggcacaacatcggaaaaccattcaattgggtcgcggtaccgcccgggatccaccggtcgcacctggtgagcaagggcagggagctgtcaccggggtggtgcc</p> |  |  |



catcctggctgagctggacggcgacgtaaacggccacaagttcagcgtgtccggcgagggcgagggcgatgc  
cacctacggcaagctgacctgaagtcatctgcaccaccggcaagctcccgtgccctggcccacctctgta  
ccacctgacctagggcgtgagtgctttagcggctaccccgaccatgaagcagcagcacttctcaagtc  
gccatgcccgaaggctacgtccaggagcgcaccatcttcaaggacgagggcaactacaagaccgcgcc  
gaggtgaagttcgagggcgacacctgggtaaccgcatcgagctgaaggcgcactcaaggaggacggc  
aacatcctggggcacaagctggagtacaactacaacagccacaacgtctatatcatggccgacaagcagaag  
aacggcatcaaggtgaactcaagatccgccacaacatcgaggacggcagcgtgcagctcggcaccactac  
cagcagaacacccccatggcgacggccccgtgctgctgcccgacaaccactacctgagcaccagtc  
ctgagcaaagacccccacgagaagcgcatcacatggtcctgctggagttcgtgaccgcccgggatcactc  
tcggcatggacgagctgtacaagtaagcggcggctcagcctaagcttagataagatatccgatccaccg  
gttctagataactgatcataatcagccataccacattttagaggttttacttgccttaaaaaacctcccacact  
ccccctgaacctgaaacataaaatgaatgcaattgttggtaactgtttattgagcttataatggttaaaa  
taaagcaatagcatcaaaattcacaataaagcattttttactgactttagttggtttgtccaaactca  
tcaatgtatcttaacgaggatcggcggtgtaagggtgggaaagaatataaggtgggggtcttatgtagt  
ttttagctgttttgcagcagccgcccggccatgagcaccactcgtttaggaagcattgtgagctcatatt  
gacaacgcgcatgccccatgggcccgggtgctcagaatgtgagggctccagcattgatggtcggccgctc  
ctgcccgaaacttactactctgacctacgagaccgtgctggaacggcgttgagactgagcctccgccc  
cgcttagcggctgagccaccgcccgggattgtgactgacttcttctgagcccgttcaagcagtg  
agcttcccgttcatccgcccgcgatgacaagtgacggctctttggcacaattggattctttgaccgggaactt  
aatgtcgtttctcagcagctgttgatctgcgcagcaggtttctccctgaaggcttctccctccaatg  
tttaaaacataaataaaaaaccagactctgtttgatttgatcaagcaagtgcttctgctctttattaggggt  
ttgcgcgcggttaggcccgggaccagcggctcggctggtgagggctctgtatttttccaggacgtggt  
aaggtgactctggatggtcagatacatgggcataagcccgtctctggggtggaggtgacccactgagagct  
tcatgctgcccgggtggtgttagatgatccagctgtagcaggagcgtggcggtgcttaaaaaatgcttt  
cagtagcaagctgattgccaggggagggccttggtgtaagtgttcaaaagcggttaagctgggatgggtgc  
atacgtggggatagatgcatcttgactgtattttaggttggtatgttccagccataatccctccggggat  
tcatgttgcagaaccaccagcagatgcatccggtgacttgggaaattgtcatgtagcttagaaggaaat  
gcgtggaagaacttgagacgccctgtgacctcaagatttccatgacttccataatgatggcaatggg  
cccacgggcccggcctggggaagataatctgggatcactaacgtcatagttgttccaggatgagatcgt  
cataggccattttcaaaagcggcggggaggggtccagactcgggtataatggttccatccgcccagggg  
gtagttaccctcacagattgacattccacgctttgagttcagatgggggatcatgtctactcggggcgat  
gaagaaaacggtttccgggtaggggagatcagctgggaagaagcaggttctgagcagctgcgacttacc  
gcagccggtgggcccgtaaatcacacctattaccggtgcaactggttagtaagagagctgagctgctca  
tcctgagcagggggccacttcttaagcatgctcctgactcagatgtttccctgaccaaataccgcaag  
gcgctcggcccagcagatgagcttctgcaaggaagcaagttttcaacggttgagaccgtccgcccgtag  
gcatgctttgagcgtttgaccaagcagttccaggcgggtcccacagctcggcacctgctctacggcatctc  
ccagcatalctctcgtttcgccgggtggggcggcttctgctgtagcagtagctggtgctcgtccagacggg  
cagggctcatgctttccacgggaggggtcctgctcagcgtagctggtgacggggaaggggtgctcgg  
gctgctgctggccaggggtgctgctgaggtgctgctgagcgtgctgagcgtcgggtcttccgctgctg  
cggccaggtgacattgacatggtgcatagtcagcccctccgcggtggccttggcgcgagcttccc  
ttggaggaggcggcagcaggggagctgagacttttagggcgtagagcttggcgcgagaataccgat  
tccggggagtaggcatccgcccagggcccagcaggtctcagattccacgagccaggtgagctctggcc  
gttcggggtaaaaaaccaggtttccccatgctttttgatgctttcttactctggtttccatgagccggttcca  
cgctcgggtgacgaaaaggctgtccgtgtccccgtatacagacttgagagggtttaaacaattcaatagctt  
gttgcagggggcgatataaaatgcaaggtgctgctcaaaaaatcaggcaaacctcgcgcaaaaaagaa  
agcacatcgtatgctcatgagataaaggcaggttaagctccggaaccaccagaaaaagacaccatt  
tttctcaaacatgctcgggtttctgataaacacaaaataaaatacaaaaaaacattaaacattagaa  
gcctgtctacaacaggaaaaaaccttataagcataagacggactacggccatgcccggcgtgaccgtaa  
aaaaactggtcaccgtgattaaaaagcaccaccgacagctcctcgggtcagctccggagtataatgtaagact  
cggtaaacacatcaggttattcaatcaggtcagtgctaaaaagcagccgaaatagcccgggggaatacata  
cccgagcgttagagacaacattacgccccataggaggtataacaaaatgagggagagaaaaacaca  
taaacactgaaaaacctctgcttagcaaaatgacccctcccgtccagaacaacatacagcgttcca  
cagcggcagccataacagtcagccttaccagtaaaaagaaaacctataaaaaaacaccactcgacacgg

|  |                                                                                                                                                                                                                                                                                                                                                                                                                                                                                                                                                                                                                                                                                                                                                                                                                                                                                                                                                                                                                                                                                                                                                                                                                                                                                                                                                                                                                                                                                                                                                                                                                                                                                                                                                                                                                                                                                                                                                                                                                                                                                                                                                                                                                                                                                                                                                                                                                                                                                                                                                                                                                                                                                                                                                                                                                                                                                                                                                                                                                                                                                                       |  |  |
|--|-------------------------------------------------------------------------------------------------------------------------------------------------------------------------------------------------------------------------------------------------------------------------------------------------------------------------------------------------------------------------------------------------------------------------------------------------------------------------------------------------------------------------------------------------------------------------------------------------------------------------------------------------------------------------------------------------------------------------------------------------------------------------------------------------------------------------------------------------------------------------------------------------------------------------------------------------------------------------------------------------------------------------------------------------------------------------------------------------------------------------------------------------------------------------------------------------------------------------------------------------------------------------------------------------------------------------------------------------------------------------------------------------------------------------------------------------------------------------------------------------------------------------------------------------------------------------------------------------------------------------------------------------------------------------------------------------------------------------------------------------------------------------------------------------------------------------------------------------------------------------------------------------------------------------------------------------------------------------------------------------------------------------------------------------------------------------------------------------------------------------------------------------------------------------------------------------------------------------------------------------------------------------------------------------------------------------------------------------------------------------------------------------------------------------------------------------------------------------------------------------------------------------------------------------------------------------------------------------------------------------------------------------------------------------------------------------------------------------------------------------------------------------------------------------------------------------------------------------------------------------------------------------------------------------------------------------------------------------------------------------------------------------------------------------------------------------------------------------------|--|--|
|  | <p>caccagctcaatcagtcacagtgtaaaaaaggccaagtgcagagcgagtatatataggactaaaaaatgac<br/> gtaacgggttaaagtcacacaaaaaacaccagaaaaccgcacgcaacctacgccagaaaacgaaagccaa<br/> aaaaccacaacttctcaaatcgtcacttccgtttccacgttacgtcacttcccatttaagaaaactacaat<br/> tcccaacacatacaagttactccgctaaaacctacgtacccgccccgttccacgccccgcccagtcac<br/> aaactccacccccctattatcatattggcttcaatccaaaataaggtatattatgatgatgtaattaacatgca<br/> tggatccatattgcggtgtgaaataaccgcacagatgcgtaaggagaaaataccgcatcaggcgcttccgctt<br/> cctcgtcactgactcgtcgtcggctcggctcggctcggcgagcggtatcagctcactcaaaggcggtataa<br/> cggttatccacagaatcaggggataacgcaggaagaacatgtgagcaaaaggccagcaaaaggccagga<br/> accgtaaaaaggccggttgctggcgttttccataggctccgccccctgacgagcatcacaanaatcgacg<br/> ctcaagtcaaggtggcgaaaccgacaggactataaagataccaggcgtttccccctggaagctccctcgtg<br/> cgctcctcgttccgaccctgcccgttaccggatacctgtccgcttttccctcgggaagcgtggcgcttttca<br/> tagctcacgctgtaggtatctcagttcgggtgtaggtcgttccgctcaagctgggctgtgtgcacgaacccccgt<br/> tcagcccagccgctgccccttaccgtaactatcgtcttgagccaacccgtaagacacgacttatcgccat<br/> ggcagcagccactgtaacaggattagcagagcgaggtatgtaggcggtgctacagagttcctgaagtggg<br/> gcctaactacggctacactagaaggacagatattggatctcgcgctcgtgaagccagttaccttcgaaaaa<br/> gagttgtagctcttgatccggcaaacaccacgctgtagcgggtggtttttgttgcaagcagcagatta<br/> cgcgcagaaaaaaggatctcaagaagatcctttgatctttctacgggctgacgctcagtggaacgaaaa<br/> ctcagtttaagggattttggctagattatcaaaaaggatcttcacctagatccttttaataaaaaatgaag<br/> tttaaatcaatctaaagtatatatagtaaaactggctgacagttaccaatgcttaacagtgaggcacctat<br/> ctcagcgtatctgtctatttcgttcatccatagttgcctgactccccgctgtagataactacgatacgggaggg<br/> cttaccatctggccccagtgctgcaatgataaccgcgagaccacgctcaccggctccagatttatcagcaataa<br/> accagccagccggaagggccgagcgcagaagtggtcctgcaactttatccgctccatccagcttattaattgt<br/> tgccgggaagctagagtaagtagttccagtaaatagtttgcgcaacggttggccattgctgcagccatgag<br/> attatcaaaaaggatcttcacctagatcctttcacgtagaaagccagtcgcgagaaacggtgctgacccgg<br/> atgaatgtcagctactgggctatctggacaagggaaaacgcaagcgaagagaaagcaggtagcttgagct<br/> gggcttacatggcgatagctagactgggcggttttatggacagcaagcgaaccggaattgccagctggggcgc<br/> cctcgtgtaaggtgggaagccctgcaaagtaaaactggatggctttctgcccgaaggatctgatggcgagg<br/> ggatcaagctctgatcaagagacaggatgaggatcgtttcgcagattgaacaagatggattgcacgagggt<br/> ctccggccgcttgggtggagaggctattcggctatgactgggcacaacagacaatcggctgctctgatgccgc<br/> gtgtccggctgtcagcgcagggcgcccgggtctttttgtcaagaccgacctgtccgggtccctgaatgaactg<br/> caagacgaggcagcgcggctatcgtggctggccacgacgggcttcttgcgcagctgtgctcagctgtca<br/> ctgaagcgggaagggactggctgctattggcgaaagtgccgggagcaggtatcctgtcatctcacctgctcct<br/> gccgagaaagtatccatcatggctgatgcaatcggcggtgcatacgttgatccggctacctgcccattcga<br/> ccaccaagcgaacatcgcatcgagcagcagctactcggatggaagccggcttctgatcaggatgatctg<br/> gacgaagagcatcaggggctcgcgacccgaactgttcgacaggctcaaggcagcatgccgacggcga<br/> ggatctcgtcgtgacctgagcagctgctgctgccaatatcatggtggaaaatggccgctttctgattcat<br/> cgactgtggccggctgggtgtggcgaccgctatcaggacatagcgttggctaccctgatattgctgaagag<br/> cttggcggcgaatgggctgaccgcttctcgtgctttacggatcgcgctcccattcgcagcgcacgcttct<br/> atcgcttctgacgagttcttgaattttgttaaaattttgttaaatca</p> |  |  |
|--|-------------------------------------------------------------------------------------------------------------------------------------------------------------------------------------------------------------------------------------------------------------------------------------------------------------------------------------------------------------------------------------------------------------------------------------------------------------------------------------------------------------------------------------------------------------------------------------------------------------------------------------------------------------------------------------------------------------------------------------------------------------------------------------------------------------------------------------------------------------------------------------------------------------------------------------------------------------------------------------------------------------------------------------------------------------------------------------------------------------------------------------------------------------------------------------------------------------------------------------------------------------------------------------------------------------------------------------------------------------------------------------------------------------------------------------------------------------------------------------------------------------------------------------------------------------------------------------------------------------------------------------------------------------------------------------------------------------------------------------------------------------------------------------------------------------------------------------------------------------------------------------------------------------------------------------------------------------------------------------------------------------------------------------------------------------------------------------------------------------------------------------------------------------------------------------------------------------------------------------------------------------------------------------------------------------------------------------------------------------------------------------------------------------------------------------------------------------------------------------------------------------------------------------------------------------------------------------------------------------------------------------------------------------------------------------------------------------------------------------------------------------------------------------------------------------------------------------------------------------------------------------------------------------------------------------------------------------------------------------------------------------------------------------------------------------------------------------------------------|--|--|

### Cultured Cells

| Name                                                                                   | Vendor or Source                                 | Sex (F, M, or unknown) | Persistent ID / URL                                                                                                                                                                                                                                                                                                                                |
|----------------------------------------------------------------------------------------|--------------------------------------------------|------------------------|----------------------------------------------------------------------------------------------------------------------------------------------------------------------------------------------------------------------------------------------------------------------------------------------------------------------------------------------------|
| Adult ventricular cardiomyocytes enzymatically isolated from New Zealand White rabbits | Charles River Laboratories (Wilmington, MA, USA) | M                      | Wood BM, Simon M, Galice S, Alim CC, Ferrero M, Pinna NN, Bers DM, Bossuyt J. Cardiac CaMKII activation promotes rapid translocation to its extra-dyadic targets. <i>J Mol Cell Cardiol.</i> 2018;125:18-28. doi: 10.1016/j.yjmcc.2018.10.010. <a href="https://www.jmcc-online.com/article/S0022-">https://www.jmcc-online.com/article/S0022-</a> |

|                                           |                                                                                 |   |                                          |
|-------------------------------------------|---------------------------------------------------------------------------------|---|------------------------------------------|
|                                           |                                                                                 |   | <a href="#">2828(18)31023-X/fulltext</a> |
| Human embryonic kidney 293 (HEK293) cells | Gift from Dr. Peter P. Jones, Department of Physiology, University of Otago, NZ | F |                                          |

### RT-qPCR oligonucleotide primer sequences

| Description                                                                                                    | Source / Repository                       | Persistent ID / URL |
|----------------------------------------------------------------------------------------------------------------|-------------------------------------------|---------------------|
| CaMKII $\delta$ ( <i>CAMK2D</i> )<br>F: gtgacacctgaagccaaaga<br>R: catcatggaggcaacagtagag                      | Eurofins Genomics,<br>Louisville, KY, USA |                     |
| CaMKII $\gamma$ ( <i>CAMK2G</i> )<br>F: aagctggagcctacgatttc<br>R: gcgctttgcagggttatg                          | Eurofins Genomics,<br>Louisville, KY, USA |                     |
| $\beta$ -myosin heavy chain ( <i>MYH7</i> )<br>F: agatggctggtttggatgag<br>R: ttggccttggtcagagtattg             | Eurofins Genomics,<br>Louisville, KY, USA |                     |
| Natriuretic peptide precursor A ( <i>NPPA</i> )<br>F: caggccatattggagcaaatc<br>R: gggcatgacctcatcttctac        | Eurofins Genomics,<br>Louisville, KY, USA |                     |
| Glyceraldehyde 3-phosphate dehydrogenase ( <i>GAPDH</i> )<br>F: aacagcaactcccactcttc<br>R: cctgttgctgtagcgtatt | Eurofins Genomics,<br>Louisville, KY, USA |                     |
